# Supplementary material
Source: PubMed Central journal article supplement (PMC4398060)
Supplement: NIHMS678170-supplement-supplement_1.pdf [file NIHMS678170-supplement-supplement_1.pdf]

## Supplemental Information

### Supplemental Figure Summary

#### **Figure S1, related to Figure 1. Intrachromosomal repair of a single or two DSBs in LIG4-XRCC4 deficient HCT116 human cells**

- A. Indel formation: T7 assay at the p84 locus after a ZFN<sup>p84</sup> DSB.
- B. AseI-resistant junction sequences after a ZFN<sup>EWS</sup> DSB on Chr22.
- C. Junction sequences at a 3.2 kb deletion on Chr11 after ZFN<sup>FLI-A</sup> and ZFN<sup>FLI-B</sup> DSBs.

#### **Figure S2, related to Figure 2. Translocation junction sequences from ZFN<sup>EWS</sup> and ZFN<sup>p84</sup> DSBs derived from wild-type and XRCC4 deficient HCT116 cells.**

#### **Figure S3, related to Figure 3. Translocations induced by ZFN<sup>EWS</sup> and ZFN<sup>p84</sup> DSBs in pre-B cells and patient-derived cells with LIG4 mutations.**

- A. Indel formation: T7 assay at the p84 locus after a ZFN<sup>p84</sup> DSB.
- B. Translocation junction sequences from pre-B cells.
- C. Translocation junction sequences from patient-derived cells.

#### **Figure S4, related to Figure 4. DSBs induced by TALENs, wild-type Cas9, and paired nCas.**

- A. Relative positions of nCas9 cleavage sites.
- B. Indel formation at the ALK locus after a TAL<sup>ALK</sup>, Cas9(ALK1) or nCas9(ALK1+ALK2) DSB.

#### **Figure S5, related to Figure 5. NPM-ALK cancer translocation junctions induced by TALENs, wild-type Cas9, and paired nCas.**

- A. Nuclease expression is quantified after 48 h by Western blotting for the HA epitope for TALENs or GFP expression for Cas9 and nCas9.
- B. Translocation junction sequences from TALENs.
- C. Translocation junction sequences from wild-type Cas9.
- D. Translocation junction sequences from paired nCas9.

#### **Figure S6, related to Figure 6. LIG3 is not required for translocation formation in human cells.**

- A. LIG3 null cells: Western blot, PCR genotyping, and ZFN expression, T7 assay at p84 and ALK loci.
- B. Translocation junction sequences from ZFNs.
- C. Translocation junction sequences from Cas9
- D. Translocation junction sequences from paired nCas9.

#### **Figure S7, related to Figure 7. Translocation junction sequences from ZFN<sup>EWS</sup> and ZFN<sup>p84</sup> expression after CtIP depletion.**

- A. Western blot of CtIP knock-down and T7 assay at p84 locus.
- B. Translocation junction sequences from ZFNs in wild-type cells.
- C. Translocation junction sequences from ZFNs in XRCC4-deficient cells.

## Supplemental Figures

### Figure S1, related to Figure 1. Intrachromosomal repair of single or two DSBs in *LIG4/XRCC4*-deficient human HCT116 cells.

- A. Indel formation: Indel formation is reduced in both *L4*<sup>-/-</sup> and *X4*<sup>-/-</sup> cells at the ZFN<sup>p84</sup> cleavage site, as monitored by the T7-endonuclease assay {n = 7 for wt, n = 10 for het (+/-) and mutant (-/-)}.

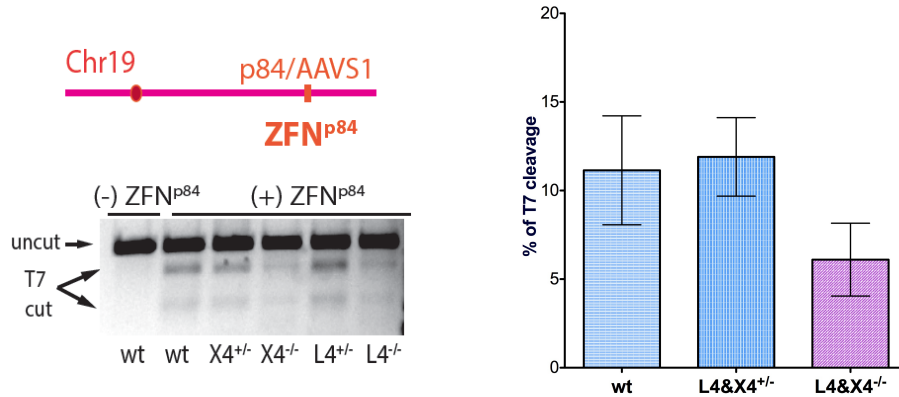

- B. AseI-resistant junction sequences after a ZFN<sup>EWS</sup> DSB on Chr22. Duplicate junction sequences were counted twice only if they arose in independent experiments, although results were similar if all sequences were counted. The ZFN recognition sequences at each DNA end are underlined; bps in italics represent the overhangs. Microhomologies (underlined), insertions (green) and lengths of deletions from each end are indicated.

#### HCT116 WT

Blue : AseI site

DNA ends:

AATAGCTGCCTCCCCACTTTACATTAAAT

GACTTGATAGGGAGGCCAAAAAACGATGTT

|    |                                |           |                                 |
|----|--------------------------------|-----------|---------------------------------|
| 29 | AATAGCTGCCTCCCCACTTTACATTA-1   | <b>T</b>  | TGACTTGATAGGGAGGCCAAAAACGATGTT  |
| 42 | AATAGCTGCCTCCCCACTTTACATTA-1   |           | TGACTTGATAGGGAGGCCAAAAACGATGTT  |
| 11 | AATAGCTGCCTCCCCACTTTACATTA-1   |           | -2CTGATAGGGAGGCCAAAAACGATGTT    |
| 35 | AATAGCTGCCTCCCCACTTTACATTA-2   |           | -1ACTGATAGGGAGGCCAAAAACGATGTT   |
| 22 | AATAGCTGCCTCCCCACTTTACA...-5   |           | GACTTGATAGGGAGGCCAAAAACGATGTT   |
| 9  | AATAGCTGCCTCCCCACTTTACA...-5   |           | -2CTGATGGGGAGGCCAAAAACGATGTT    |
| 3  | AATAGCTGCCTCCCCACTTTACATT...-3 | <b>G</b>  | -4...GATAGGGAGGCCAAAAACGATGTT   |
| 54 | AATAGCTGCCTCCCCACTTTACATT...-3 | <b>TT</b> | -5...ATAGGGAGGCCAAAAACGATGTT    |
| 16 | AATAGCTGCCTCCCCAC.....-9       |           | ATGACTTGATAGGGAGGCCAAAAACGATGTT |
| 36 | AATAGCTGCCTCCCCACTT.....-9     | <b>AT</b> | GACTTGATAGGGAGGCCAAAAACGATGTT   |
| 53 | AATAGCTGCCTCCCCACTTTAC.....-6  |           | -3.TGATGGGGAGGCCAAAAACGATGTT    |
| 26 | AATAGCTGCCTCCCCACT.....-10     |           | -3.TGATAGGGAGGCCAAAAACGATGTT    |
| 45 |                                |           |                                 |

|                              |            |                                 |
|------------------------------|------------|---------------------------------|
| AATAGCTGCCTCCCCACTTTA.....-5 |            | -8.....GGGAGGCCAAAAACGATGTT     |
| 4                            |            |                                 |
| AATAGCTGCCTCCCCACT.....-10   |            | -4..GATAGGGAGGCCAAAAACGATGTT    |
| 52                           |            |                                 |
| AATAGCTGCCTCCCCA.....-10     | <b>A</b>   | -13.....GCCAAAAACGATGTT         |
| 5                            |            |                                 |
| AATAGCTGCCTCCCCAC.....-11    |            | -13.....GCCAAAAACGATGTT         |
| 6                            |            |                                 |
| AATAGCTGCC.....-18           |            | -16.....AAAAACGATGTT            |
| 47                           |            |                                 |
| AATAGCTGCCTCCCCA.....-12     |            | -15.....AAAACGATGTT             |
| 19                           |            |                                 |
| AATAGCTGCCTCCCCA.....-12     |            | -17.....AAAACGATGTT             |
| 41                           |            |                                 |
| AATAGCTGCCTCCC.....-14       |            | -16.....AAAAACGATGTT            |
| 46                           |            |                                 |
| AATAGCTGCCTCCC.....-14       |            | -16.....AAAAACGATGTT            |
| 25                           |            |                                 |
| CTG.....-29                  |            | -5...ATAGGGAGGCCAAAAACGATGTT    |
| 43                           |            |                                 |
| AATAGCTGC.....-19            |            | -16.....AAAAACGATGTT            |
| 48                           |            |                                 |
| AATAG.....-24                |            | -23.....ATGTT                   |
| 39                           |            |                                 |
| .....-29                     | <b>+11</b> | -20.....                        |
| <b>GATAGCTGGC</b>            |            |                                 |
| 40                           |            |                                 |
| .....-49                     |            | TGACTGATAGGGAGGCCAAAAACGATGTT   |
| 10                           |            |                                 |
| AATAGCTGCCTCCCCA.....-12     | <b>TG</b>  | -44.....                        |
| 37                           |            |                                 |
| TG.....-29                   |            | -30.....                        |
| 1                            |            |                                 |
| AATAGCTGCCTCCCCA.....-12     |            | -59.....                        |
| 15                           |            |                                 |
| GC.....-31                   |            | -42.....                        |
| 49                           |            |                                 |
| AATAGC.....-22               |            | -72.....                        |
| 18                           |            |                                 |
| CT.....-30                   |            | -79.....                        |
| 17                           |            |                                 |
| AATAGCTGCCTCC.....-15        |            | -133.....                       |
| 34                           |            |                                 |
| AATAGCTGCCTCCCCACT.....-10   |            | -190.....                       |
| 24                           |            |                                 |
| A.....-27                    |            | -208.....                       |
| 27                           |            |                                 |
| AATAGCTGC.....-19            |            | -235.....                       |
| 51                           |            |                                 |
| .....-251                    |            | -13..... <u>CA</u> AAAAACGATGTT |
| 50                           |            |                                 |
| .....-393                    |            | -12..... <u>CC</u> AAAAACGATGTT |
| 44                           |            |                                 |
| .....-401                    |            | -11.....GCCAAAAACGATGTT         |

**HCT116 X4+/-**

---

|                              |                              |
|------------------------------|------------------------------|
| AATAGCTGCCTCCCCACTTTACATTAAT | GACTGATAGGGAGGCCAAAAACGATGTT |
|------------------------------|------------------------------|

---

|                              |  |                              |
|------------------------------|--|------------------------------|
| 36                           |  |                              |
| AATAGCTGCCTCCCCACTTTACATTA-2 |  | GACTGATAGGGAGGCCAAAAACGATGTT |
| 27                           |  |                              |
| AATAGCTGCCTCCCCACTTTACATTA-1 |  | -2CTGATAGGGAGGCCAAAAACGATGTT |

|    |                              |          |                                |
|----|------------------------------|----------|--------------------------------|
| 32 | AATAGCTGCCTCCCCACTTTACATT.-3 |          | GACTGATAGGGAGGCCAAAAACGATGTT   |
| 11 | AATAGCTGCCTCCCCACTTTACATTA-2 |          | -2CTGATAGGGAGGCCAAAAACGATGTT   |
| 12 | AATAGCTGCCTCCCCACTTTACAT..-4 |          | GACTGATAGGGAGGCCAAAAACGATGTT   |
| 3  | AATAGCTGCCTCCCCACTTT.....-8  |          | GACTGATAGGGAGGCCAAAAACGATGTT   |
| 39 | AATAGCTGCCTCCCCACTTT.....-8  | TAT      | GACTGATAGGGAGGCCAAAAACGATGTT   |
| 25 | AATAGCTGCCTCCCCACT.....-10   |          | -4..GATAGGGAGGCCAAAAACGATGTT   |
| 17 | AATAGCTGCCTCCCCACTTTACA...-5 |          | -13.....GCCAAAAACGATGTT        |
| 24 | AATAGCTG.....-20             |          | ATGACTGATAGGGAGGCCAAAAACGATGTT |
| 21 | AATAGCTGCCTCCCC.....-13      |          | -18.....AAACGATGTT             |
| 33 | AATAG.....-23                |          | -9.....GGAGGCCAAAAACGATGTT     |
| 8  | AATAGCTGCCTCCCCACTTTACA...-5 |          | -18.....AAACGATGTT             |
| 38 | AATAGCTGCCTCC.....-15        |          | -18.....AAACGATGTT             |
| 29 | AATAG.....-23                |          | -11.....AGGCCAAAAACGATGTT      |
| 22 | AATAGC.....-22               |          | -15.....CAAAAACGATGTT          |
| 23 | .....-34                     | TTTTTGAT | -23.....ATGTT                  |
| 15 | CA.....-39                   |          | -75.....                       |
| 7  | .....-49                     | CA       | -77.....                       |
| 40 | C.....-100                   |          | -73.....                       |
| 2  | AATAGCTGCCTCCCCACTTTACA...-5 |          | -226.....                      |
| 10 | AATAGCTGCCTCC.....-15        |          | -225.....                      |
| 19 | AATAGCTGCCTCCCCAC.....-11    |          | -229.....                      |
| 31 | CT.....-250                  |          | -35.....                       |
| 34 | GA.....-284                  |          | -22.....                       |
| 30 | CA.....-90                   |          | -335.....                      |

**HCT116 L4+/-**

---

|                              |                              |
|------------------------------|------------------------------|
| AATAGCTGCCTCCCCACTTTACATTAAT | GACTGATAGGGAGGCCAAAAACGATGTT |
| 5                            |                              |
| AATAGCTGCCTCCCCACTTTACATTA-1 | -2CTGATAGGGAGGCCAAAAACGATGTT |
| 19                           |                              |
| AATAGCTGCCTCCCCACTTTACATTA-2 | -2CTGATAGGGAGGCCAAAAACGATGTT |
| 13                           |                              |
| AATAGCTGCCTCCCCACTTT.....-8  | GACTGATAGGGAGGCCAAAAACGATGTT |
| 24                           |                              |
| AATAGCTGCCTCCCCACTTT.....-8  | -4..GATAGGGAGGCCAAAAACGATGTT |
| 3                            |                              |
| AATAGCTGCCTCCCCACTTT.....-8  | -5...ATAGGGAGGCCAAAAACGATGTT |

|    |                              |        |                                |
|----|------------------------------|--------|--------------------------------|
| 18 | AATAGCTGCCTCCCCACTTTACATTA-2 |        | -12.....GGCCAAAAACGATGTT       |
| 34 | AATAGCTGCCTCCCCACTTTACATT.-3 |        | -12.....GGCCAAAAACGATGTT       |
| 11 | AATAGCTG.....-20             |        | ATGACTGATAGGGAGGCCAAAAACGATGTT |
| 9  | AATAGCTGCCTCCCCA.....-12     |        | -18.....AAACGATGTT             |
| 1  | AATAGCTGCC.....-18           |        | -16.....AAAAACGATGTT           |
| 32 | AATAGCTGCC.....-18           |        | -16.....CAAAAACGATGTT          |
| 10 | AATAGCTGCC.....-18           |        | -25.....GTT                    |
| 12 | AA.....-26                   | CATC   | -18.....AAACGATGTT             |
| 36 | A.....-25                    | T      | -20.....ACGATGTT               |
| 29 | AA.....-26                   |        | -21.....CGATGTT                |
| 31 | .....-30                     |        | -18.....AAACGATGTT             |
| 27 | AATAGC.....-22               | CAGCTA | -30.....                       |
| 17 | CA.....-38                   |        | -18.....AAACGATGTT             |
| 21 | CTGCA.....-27                |        | -39.....                       |
| 23 | CAA.....-26                  |        | -18.....AAACGATGTT             |
| 33 | AATA.....-24                 |        | -44.....                       |
| 16 | AA.....-26                   |        | -20.....ACGATGTT               |
| 22 | TTTACT.....-61               |        | -31.....                       |
| 28 | TGG.....-33                  |        | -144.....                      |
| 30 | AATAGCTGCCTCC.....-15        |        | -215.....                      |
| 35 | .....-370                    |        | -22.....GATGTT                 |
| 25 | TG.....-411                  |        | -24.....TGTT                   |
| 20 | .....-35                     | +33    | -18.....AAACGATGTT             |

33bp : 11bp from Homo sapiens chr4, alternate assembly CHM1\_1.1 and 22 bp from EWS  
inverted duplication downstream DSB  
AAATAGCTGCCTATTGCAGGCCACTATGATT

**HCT116 X4-/-**

---

|                              |                              |
|------------------------------|------------------------------|
| AATAGCTGCCTCCCCACTTTACATTAAT | GACTGATAGGGAGGCCAAAAACGATGTT |
|------------------------------|------------------------------|

---

|    |                      |  |                    |
|----|----------------------|--|--------------------|
| 34 | AATAGCTGCCTC.....-16 |  | -18.....AAACGATGTT |
| 17 | AAT.....-25          |  | -25.....GTT        |
| 26 | AAT.....-25          |  | -32.....           |
| 7  | AATAGCT.....-21      |  | -37.....           |
| 20 |                      |  |                    |

|                                                                                |      |     |                    |
|--------------------------------------------------------------------------------|------|-----|--------------------|
| AATA.....                                                                      | -24  |     | -46.....           |
| 4                                                                              |      |     |                    |
| .....                                                                          | -37  | +11 | -36.....           |
| <b>11bp: TGCATACAAAA</b>                                                       |      |     |                    |
| 1                                                                              |      |     |                    |
| CAA.....                                                                       | -26  |     | -49.....           |
| 28                                                                             |      |     |                    |
| AG.....                                                                        | -36  |     | -60.....           |
| 29                                                                             |      |     |                    |
| CA.....                                                                        | -65  |     | -39.....           |
| 24                                                                             |      |     |                    |
| CATA.....                                                                      | -62  |     | -46.....           |
| 10                                                                             |      |     |                    |
| .....                                                                          | -138 |     | -20.....ACGATGTT   |
| 2                                                                              |      |     |                    |
| AA.....                                                                        | -175 |     | -20.....ACGATGTT   |
| 8                                                                              |      |     |                    |
| CC.....                                                                        | -30  |     | -178.....          |
| 6                                                                              |      |     |                    |
| .....                                                                          | -198 | +27 | -18.....AAACGATGTT |
| <b>27pb : Duplication from chr22 419bp upstream DSB</b>                        |      |     |                    |
| <b>CTGAGCTCCATAAATCAACACTACATC From Homo sapiens chromosome 22, GRCh37.p13</b> |      |     |                    |
| 3                                                                              |      |     |                    |
| .....                                                                          | -53  | A   | -173.....          |
| 33                                                                             |      |     |                    |
| ATGA.....                                                                      | -180 |     | -25.....           |
| 9                                                                              |      |     |                    |
| AATAGCTGCCTCCCA.....                                                           | -12  |     | -226.....          |
| 36                                                                             |      |     |                    |
| .....                                                                          | -403 |     | -55.....           |
| 35                                                                             |      |     |                    |
| TAAAAA.....                                                                    | -370 |     | -136.....          |
| 30                                                                             |      |     |                    |
| ATC.....                                                                       | -180 |     | -363.....          |
| 32                                                                             |      |     |                    |
| ATGTGT.....                                                                    | -334 |     | -214.....          |

**HCT116 L4-/-**

|                             |     |                             |
|-----------------------------|-----|-----------------------------|
| AATAGCTGCCTCCCACTTTACATTAAT |     | GACTGATAGGGAGGCCAAAACGATGTT |
| 1                           |     |                             |
| AATAGCTGCCTCCCACTTTACA...   | -5  | -16.....AAAAACGATGTT        |
| 4                           |     |                             |
| AATAGCTG.....               | -20 | -5...ATAGGGAGGCCAAAACGATGTT |
| 13                          |     |                             |
| AATAGCTG.....               | -20 | -10.....GAGGCCAAAACGATGTT   |
| 2                           |     |                             |
| AATAGCTGCC.....             | -18 | -16.....AAAAACGATGTT        |
| 42                          |     |                             |
| AATAGCTGC.....              | -19 | -16.....AAAAACGATGTT        |
| 18                          |     |                             |
| AAT.....                    | -25 | -19.....AACGATGTT           |
| 3                           |     |                             |
| AAT.....                    | -25 | -25.....GTT                 |
| 20                          |     |                             |
| AATAGCTGC.....              | -19 | -43.....                    |
| 7                           |     |                             |
| AAAA.....                   | -42 | -21.....CGATGTT             |
| 34                          |     |                             |
| CA.....                     | -42 | -45.....                    |
| 22                          |     |                             |
| CA.....                     | -74 | -41.....                    |

|    |                             |            |                              |
|----|-----------------------------|------------|------------------------------|
| 37 | <u>AC</u> .....-66          |            | -38.....                     |
| 39 | <u>TGG</u> .....-33         |            | -278.....                    |
| 41 | .....-322                   | <b>CC</b>  | -32.....                     |
| 8  | .....-354                   |            | -10..... <b>AAAAACGATGTT</b> |
| 36 | AATAGCTGCCTCCCCACTTT.....-8 |            | -357.....                    |
| 35 | .....-411                   |            | -24.....TGTT                 |
| 44 | <u>TT</u> .....-407         |            | -109.....                    |
| 43 | .....-272                   | <b>ATT</b> | -278.....                    |
| 40 | <u>TCT</u> .....-393        |            | -162.....                    |

C. Junction sequences at a 3.2 kb deletion on Chr11 after ZFN<sup>FLI-A</sup> and ZFN<sup>FLI-B</sup> DSBs.

**Chr11**

**HCT116 WT**

---

|                                |                                                                        |
|--------------------------------|------------------------------------------------------------------------|
| GGAACCCTAAGCCCTTTCCTTCATTT (GC | GT) CCCC <span style="color: green;">GATGAAAAGCAGGTTAGGTTGAGGGA</span> |
|--------------------------------|------------------------------------------------------------------------|

---

|    |                                       |                                                                      |
|----|---------------------------------------|----------------------------------------------------------------------|
| 15 | GGAACCCTAAGCCCTTTCCTTCATTT <u>G</u> . | .TCCC <span style="color: green;">GATGAAAAGCAGGTTAGGTTGAGGGA</span>  |
| 2  | GGAACCCTAAGCCCTTTCCTTCATTT..          | ..CCCC <span style="color: green;">GATGAAAAGCAGGTTAGGTTGAGGGA</span> |
| 5  | GGAACCCTAAGCCCTTTCCTTCATTT-1.         | ..CCCC <span style="color: green;">GATGAAAAGCAGGTTAGGTTGAGGGA</span> |
| 7  | GGAACCCTAAGCCCTTTCCTTCATTT <u>GC</u>  | .-1CCC <span style="color: green;">GATGAAAAGCAGGTTAGGTTGAGGGA</span> |
| 4  | GGAACCCTAAGCCCTTTCCTTCATTT <u>GC</u>  | ..-2CC <span style="color: green;">GATGAAAAGCAGGTTAGGTTGAGGGA</span> |
| 1  | GGAACCCTAAGCCCTTTCCTTCATTT-2..        | ..CCCC <span style="color: green;">GATGAAAAGCAGGTTAGGTTGAGGGA</span> |
| 59 | GGAACCCTAAGCCCTTTCCTTCATTT-1.         | .-1CCC <span style="color: green;">GATGAAAAGCAGGTTAGGTTGAGGGA</span> |
| 28 | GGAACCCTAAGCCCTTTCCTTCATTT..          | ..-3.CGAT <span style="color: green;">GAAAAGCAGGTTAGGTTGAGGGA</span> |
| 14 | GGAACCCTAAGCCCTTTCCTTCATTT <u>GC</u>  | ..-5...ATG <span style="color: green;">AAAAGCAGGTTAGGTTGAGGGA</span> |
| 31 | GGAACCCTAAGCCCTTTCCTTC...-4..         | .-1CCC <span style="color: green;">GATGAAAAGCAGGTTAGGTTGAGGGA</span> |
| 34 | GGAACCCTAAGCCCTTTCCTTCATTT-2..        | ..-5...ATG <span style="color: green;">AAAAGCAGGTTAGGTTGAGGGA</span> |
| 17 | GGAACCCTAAGCCCTTTC...-7..             | ..-2CC <span style="color: green;">GATGAAAAGCAGGTTAGGTTGAGGGA</span> |
| 32 | GGAACCCTAAGCCCTTTCCTTCATTT-1.         | ..-12.....CAGGTTAGGTTGAGGGA                                          |
| 8  | GGAACC...-19..                        | ..-3.CGAT <span style="color: green;">GAAAAGCAGGTTAGGTTGAGGGA</span> |

**HCT116 X4+/-**

---

|                                |                                                                        |
|--------------------------------|------------------------------------------------------------------------|
| GGAACCCTAAGCCCTTTCCTTCATTT (GC | GT) CCCC <span style="color: green;">GATGAAAAGCAGGTTAGGTTGAGGGA</span> |
|--------------------------------|------------------------------------------------------------------------|

|    |                                      |                                   |
|----|--------------------------------------|-----------------------------------|
| 5  | GGAACCCTAAGCCCTTTCCTTCATT <u>G</u> . | .TCCCCGATGAAAAGCAGGTTAGGTTGAGGGA  |
| 16 | GGAACCCTAAGCCCTTTCCTTCATT..          | .TCCCCGATGAAAAGCAGGTTAGGTTGAGGGA  |
| 4  | GGAACCCTAAGCCCTTTCCTTCATT..          | ..CCCCGATGAAAAGCAGGTTAGGTTGAGGGA  |
| 8  | GGAACCCTAAGCCCTTTCCTTCATT-1.         | ..CCCCGATGAAAAGCAGGTTAGGTTGAGGGA  |
| 15 | GGAACCCTAAGCCCTTTCCTTCAT-2..         | ..CCCCGATGAAAAGCAGGTTAGGTTGAGGGA  |
| 21 | GGAACCCTAAGCCCTTTCCTTCATT-1.         | .-1CCCCGATGAAAAGCAGGTTAGGTTGAGGGA |
| 18 | GGAACCCTAAGCCCTTTCCTTCA.-3..         | ..CCCCGATGAAAAGCAGGTTAGGTTGAGGGA  |
| 19 | GGAACCCTAAGCCCTTTCCTTCATT <u>G</u> . | ..-5...ATGAAAAGCAGGTTAGGTTGAGGGA  |
| 32 | GGAACCCTAAGCCCTTTCCTTC..-4..         | .-1CCCCGATGAAAAGCAGGTTAGGTTGAGGGA |
| 41 | GGAACCCTAAGCCCTTTCCTTCATT <u>G</u> . | ..-8.....AAAAGCAGGTTAGGTTGAGGGA   |
| 20 | GGAACCCTAAGCCCTTTC..-7..             | ..-2CCGATGAAAAGCAGGTTAGGTTGAGGGA  |
| 1  | GGAACCCTAAGCCCT.....-11..            | ..CCCCGATGAAAAGCAGGTTAGGTTGAGGGA  |
| 1  | GGAACCCTAAGCC.....-13..              | ..-4..GATGAAAAGCAGGTTAGGTTGAGGGA  |
| 32 | GGAACCCTAA.....-15..                 | .TCCCCGATGAAAAGCAGGTTAGGTTGAGGGA  |
| 12 | GGAAC.....-20..                      | ..-4..GATGAAAAGCAGGTTAGGTTGAGGGA  |
| 37 | GGAACCCTAAGCCCTTTCCTTCATT-1.         | ..-25.....AGGGA                   |
| 27 | GGAACCCTAAGC.....-14..               | ..-39.....                        |
| 3  | <u>GGA</u> .....-23..                | ..-49.....                        |
| 29 | GGAACC.....-20..                     | ..-49.....                        |
| 25 | CAGCAG.....-35..                     | ..-44.....                        |
| 28 | <u>AA</u> .....-49..                 | ..-37.....                        |

**HCT116 L4+/-**

|                                     |                                   |
|-------------------------------------|-----------------------------------|
| GGAACCCTAAGCCCTTTCCTTCATT (GC       | GT)CCCCGATGAAAAGCAGGTTAGGTTGAGGGA |
| 3                                   | ..-4..GATGAAAAGCAGGTTAGGTTGAGGGA  |
| GGAACCCTAAGCCCTTTCCTTCATT <u>GC</u> | ..CCCCGATGAAAAGCAGGTTAGGTTGAGGGA  |
| 4                                   | ..CCCCGATGAAAAGCAGGTTAGGTTGAGGGA  |
| GGAACCCTAAGCCCTTTCCTTCATT..         | ..CCCCGATGAAAAGCAGGTTAGGTTGAGGGA  |
| 1                                   | ..CCCCGATGAAAAGCAGGTTAGGTTGAGGGA  |
| GGAACCCTAAGCCCTTTCCTTCAT-2..        | ..-4..GATGAAAAGCAGGTTAGGTTGAGGGA  |
| 2                                   | ..-4..GATGAAAAGCAGGTTAGGTTGAGGGA  |
| GGAACCCTAAGCCCTTTCCTTCATT <u>GC</u> | ..-4..GATGAAAAGCAGGTTAGGTTGAGGGA  |
| 7                                   | ..-4..GATGAAAAGCAGGTTAGGTTGAGGGA  |
| GGAACCCTAAGCCCTTTCCTTC..-4..        | .-1CCCCGATGAAAAGCAGGTTAGGTTGAGGGA |
| 8                                   | ..-3..CGATGAAAAGCAGGTTAGGTTGAGGGA |
| GGAACCCTAAGCCCTTTC..-7..            | ..-3..CGATGAAAAGCAGGTTAGGTTGAGGGA |
| 11                                  | ..-3..CGATGAAAAGCAGGTTAGGTTGAGGGA |
| <u>CC</u> .....-47..                | ..-3..CGATGAAAAGCAGGTTAGGTTGAGGGA |
| 11                                  | ..-3..CGATGAAAAGCAGGTTAGGTTGAGGGA |
| <u>AACC</u> .....-47..              | ..-49.....                        |



**HCT116 X4-/-**

---

|                                        |                                            |
|----------------------------------------|--------------------------------------------|
| GGAACCCTAAGCCCTTTCCTTCATTT (GC         | GT) CCCC <b>GATGAAAAGCAGGTTAGGTTGAGGGA</b> |
| 1                                      |                                            |
| GGAACCCTAAGCC <u>C</u> .....-12..      | ..-4..GATGAAAAGCAGGTTAGGTTGAGGGA           |
| 5                                      |                                            |
| GGAACCCTAAG.....-15..                  | ..-5...ATGAAAAGCAGGTTAGGTTGAGGGA           |
| 46                                     |                                            |
| GGAACC <u>C</u> .....-19..             | ..-4..GATGAAAAGCAGGTTAGGTTGAGGGA           |
| 19                                     |                                            |
| GGAACCCTAAGCC.....-13..                | ..-14.....AGGTTAGGTTGAGGGA                 |
| 37                                     |                                            |
| GGAACCCTAAGCCCTTTCCTTCATTT <u>G</u> .  | ..-33.....                                 |
| 24                                     |                                            |
| <u>GCAGG</u> .....-24..                | ..-17.....TTAGGTTGAGGGA                    |
| 33                                     |                                            |
| <u>AGCAGG</u> .....-34..               | ..-17.....TTAGGTTGAGGGA                    |
| 30                                     |                                            |
| <u>GGAA</u> .....-22..                 | ..-31.....                                 |
| 32                                     |                                            |
| <u>GGAACC</u> .....-20..               | ..-49.....                                 |
| 2                                      |                                            |
| <u>CAGCAG</u> .....-35..               | ..-44.....                                 |
| 14                                     |                                            |
| <u>AGGTTAG</u> .....-76..              | ..-21.....GTTGAGGGA                        |
| 29                                     |                                            |
| <u>TGAG</u> .....-69..                 | ..-27.....GGA                              |
| 39                                     |                                            |
| <u>TTC</u> .....-41..                  | ..-65.....                                 |
| 46                                     |                                            |
| GGAACC <u>C</u> .....-19..             | ..-102.....                                |
| 7                                      |                                            |
| <u>GCAAAGC</u> .....-51..              | ..-77.....                                 |
| 9                                      |                                            |
| GGAACCCTAAGCCCTTTC <u>C</u> .....-7..  | ..-169.....                                |
| 13                                     |                                            |
| GGAACCCTAAGCC.....-13..                | ..-198.....                                |
| 10                                     |                                            |
| GGAACCCTAAG.....-15..                  | ..-201.....                                |
| 8                                      | G                                          |
| GGAACCCTAAGCCCTTTC <u>CT</u> .....-6.. | ..-207.....                                |
| 31                                     |                                            |
| GGAACCCTAAGCC.....-13..                | ..-219.....                                |
| 12                                     |                                            |
| <u>CAGC</u> .....-168..                | ..-133.....                                |

**HCT116 L4-/-**

---

|                                       |                                            |
|---------------------------------------|--------------------------------------------|
| GGAACCCTAAGCCCTTTCCTTCATTT (GC        | GT) CCCC <b>GATGAAAAGCAGGTTAGGTTGAGGGA</b> |
| 16                                    |                                            |
| GGAACCCTAAGCCCTTTC <u>C</u> .....-7.. | ..-3..CGATGAAAAGCAGGTTAGGTTGAGGGA          |
| 10                                    |                                            |
| GGAACCCTAAG.....-15..                 | ..-27.....GGA                              |
| 23                                    |                                            |
| GGA.....-23..                         | ..-23.....TGAGGGA                          |
| 17                                    |                                            |
| <u>GGAA</u> .....-22..                | ..-31.....                                 |
| 12                                    |                                            |

|                          |            |                                      |
|--------------------------|------------|--------------------------------------|
| <u>GCAG</u> .....-25..   |            | ..-44.....                           |
| 31                       |            |                                      |
| <u>CAGCAG</u> .....-35.. |            | ..-44.....                           |
| 46                       |            |                                      |
| <u>TGATT</u> .....-42..  |            | ..-55.....                           |
| 11                       |            |                                      |
| .....-117..              |            | ..-12..... <b>GCAGGTTAGGTTGAGGGA</b> |
| 5                        |            |                                      |
| .....-133..              | <b>+13</b> | ..-42.....                           |
| <b>13bp: TTATTATTTTA</b> |            |                                      |
| 25                       |            |                                      |
| .....-153..              |            | ..-24..... <u>GAGGGA</u>             |
| 46                       |            |                                      |
| <u>CC</u> .....-118..    |            | ..-69.....                           |
| 4                        |            |                                      |
| .....-186..              | <b>CTT</b> | ..-191.....                          |
| 27                       |            |                                      |
| <u>TGATT</u> .....-42..  |            | ..-55.....                           |

**Figure S2, related to Figure 2. Translocation junction sequences from ZFN<sup>EWS</sup> and ZFN<sup>P84</sup> DSBs derived from wild-type and c-NHEJ mutant HCT116 cells.**

Each junction was independently derived from small pool PCR. Deletions ≤ 800 bp could be identified. The ZFN recognition sequences at each DNA end are underlined; bps in italics represent the overhangs. The chromosome 19 end is in black and the chromosome 22 end is in red. Deletions from each end are indicated, as are microhomologies (underlined) and insertions (green). Insertions were observed in a fraction of breakpoint junctions from both control and mutant cells (wild-type, 18%; X4<sup>+/-</sup>, 14%; X4<sup>-/-</sup>, 24%).

**Der19**

**HCT116 wt**

| DNA ends:                    |                                |
|------------------------------|--------------------------------|
| TCTGTCACCAATCCTGTCCCTAGTGGCC | GTCATTAATGTAAAGTGGGGAGGCAGCT   |
| 2                            |                                |
| TCTGTCACCAATCCTGTCCCTAGTGGCC | . TCATTAATGTAAAGTGGGGAGGCAGCT  |
| 24                           |                                |
| TCTGTCACCAATCCTGTCCCTAGTGGC. | . TCATTAATGTAAAGTGGGGAGGCAGCT  |
| 26                           |                                |
| TCTGTCACCAATCCTGTCCCTAGTGGC. | .. CATTAAATGTAAAGTGGGGAGGCAGCT |
| 7, 9, 12, 18, 28             |                                |
| TCTGTCACCAATCCTGTCCCTAGTGG.. | .. CATTAAATGTAAAGTGGGGAGGCAGCT |
| 8, 20                        |                                |
| TCTGTCACCAATCCTGTCCCTAGTG-1. | .. TCATTAATGTAAAGTGGGGAGGCAGCT |
| 22                           |                                |
| TCTGTCACCAATCCTGTCCCTAGTGGC. | .. -2TTAATGTAAAGTGGGGAGGCAGCT  |
| 5, 21, 31                    |                                |
| TCTGTCACCAATCCTGTCCCTAGT-2.. | .. CATTAAATGTAAAGTGGGGAGGCAGCT |
| 32                           |                                |
| TCTGTCACCAATCCTGTCCCTAGT-2.. | . TCATTAATGTAAAGTGGGGAGGCAGCT  |
| 19                           |                                |
| TCTGTCACCAATCCTGTCCCTAGTGGC. | .. -3. TAATGTAAAGTGGGGAGGCAGCT |
| 27                           |                                |
| TCTGTCACCAATCCTGTCCCTAGTGG.. | .. -3. TAATGTAAAGTGGGGAGGCAGCT |
| 10                           |                                |
| TCTGTCACCAATCCTGTCCCTAGTG-1. | .. -3. TAATGTAAAGTGGGGAGGCAGCT |
| 17                           | C                              |
| TCTGTCACCAATCCTGTCCCTAG.-3.. | .. -3. TAATGTAAAGTGGGGAGGCAGCT |
| 13                           | GGC                            |
| TCTGTCACCAATCCTGTCCCTAGTGGC. | .. -6.... TGTAAAGTGGGGAGGCAGCT |
| 6                            | TTAAT                          |
| TCTGTCACCAATCCTGTCC...-7..   | ..-26.....T                    |
| 1                            |                                |
| GCC.....-29..                | ..-35.....                     |
| 16                           |                                |
| GG.....-32..                 | ..-34.....                     |
| 23                           |                                |
| .....-63..                   | ..-35.....                     |
| 5                            | CT                             |
| GCT.....-179..               | ..-26.....                     |
| 14                           |                                |
| .....-29..                   | ..-196.....                    |
| 25                           |                                |
| .....-251..                  | ..-27.....                     |
|                              | G                              |

**HCT116 X4+/-**



|                               |             |                                    |
|-------------------------------|-------------|------------------------------------|
| TCTGTCACCAATCCTGTCC.....-7..  |             | ..-40.....                         |
| 66                            |             |                                    |
| .....-35..                    |             | ..-13..... <b>TGGGGAGGCAGCT</b>    |
| 88                            |             |                                    |
| TCTGTCACCAATCCTGTCCCT...-5..  | <b>TTTT</b> | ..-43.....                         |
| 81                            |             |                                    |
| TCTGTCACCA.....-16..          |             | ..-37.....                         |
| 75                            |             |                                    |
| TCT.....-23..                 |             | ..-39.....                         |
| 86                            |             |                                    |
| GCT.....-28..                 |             | ..-26.....                         |
| 87                            |             |                                    |
| .....-42..                    | <b>G</b>    | ..-23.....                         |
| 90                            |             |                                    |
| .....-48..                    |             | ..-17..... <b>GGAGGCAGCT</b>       |
| 71                            |             |                                    |
| T.....-33..                   |             | ..-46.....                         |
| 73                            |             |                                    |
| TCTGTCACCAATCCTGTCCCTAG.-3..  | <b>+16</b>  | ..-144.....                        |
| <b>+16bp :GCCAAAACGATGGCC</b> |             |                                    |
| 67                            |             |                                    |
| .....-132..                   | <b>AAT</b>  | ..-34.....                         |
| 79                            |             |                                    |
| .....-134..                   | <b>G</b>    | ..-37.....                         |
| 68                            |             |                                    |
| .....-32..                    | <b>T</b>    | ..-158.....                        |
| 85                            |             |                                    |
| CT.....-256..                 |             | ..-26.....                         |
| 96                            |             |                                    |
| GCAGG.....-265..              |             | ..-34.....                         |
| 89                            |             |                                    |
| TCTGTCACCAATC.....-13..       |             | ..-299.....                        |
| 94                            |             |                                    |
| TCTGTCACCAATCCTGTCCCTAGT-2..  |             | ..-311.....                        |
| 91                            |             |                                    |
| .....-357..                   |             | ..-10..... <b>AAGTGGGGAGGCAGCT</b> |

**Der22**

**HCT116 WT**

|                                    |                                       |
|------------------------------------|---------------------------------------|
| <b>ATCGTTTTGGCCTCCCTATCAGTCATT</b> | <b>GTGGCCCACTGTGGGGTGGAGGGGACAGAT</b> |
| 2, 4, 7, 15, 24, 36, 45            |                                       |
| <b>ATCGTTTTGGCCTCCCTATCAGTCATT</b> | ..GGCCCACTGTGGGGTGGAGGGGACAGAT        |
| 6, 18, 34, 46                      |                                       |
| <b>ATCGTTTTGGCCTCCCTATCAGTCAT.</b> | ..GGCCCACTGTGGGGTGGAGGGGACAGAT        |
| 19                                 |                                       |
| <b>ATCGTTTTGGCCTCCCTATCAGTCAT.</b> | ..-1GCCCACTGTGGGGTGGAGGGGACAGAT       |
| 10, 17, 40                         |                                       |
| <b>ATCGTTTTGGCCTCCCTATCAGT-2..</b> | ..GGCCCACTGTGGGGTGGAGGGGACAGAT        |
| 38                                 |                                       |
| <b>ATCGTTTTGGCCTCCCTATCA..-4..</b> | ..-1GCCCACTGTGGGGTGGAGGGGACAGAT       |
| 3                                  |                                       |
| <b>ATCGTTTTGGCCTCCCTATCAGTCAT.</b> | ..-5...CACTGTGGGGTGGAGGGGACAGAT       |
| 26                                 |                                       |
| <b>ATCGTTTTGGCC.....-13..</b>      | ..-4..CCACTGTGGGGTGGAGGGGACAGAT       |
| 43                                 |                                       |
| <b>ATCGTTTTG.....-16..</b>         | ..-12.....GGGTGGAGGGGACAGAT           |
| 25, 27                             |                                       |
| <b>ATCGTTTT.....-17..</b>          | ..-12.....GGGTGGAGGGGACAGAT           |

35  
 .....-47.. **C** ..-22.....GACAGAT  
 11  
**ATCGTTTTGGCCT**.....-11.. ..-125.....  
 39  
**ATCGTTTT**.....-17.. ..-196.....  
 9  
**GCC**.....-239.. ..-148.....  
 44  
**ATCGTTTTGG**.....-15.. **+119** **GTGGCCCCACTGTGGGGTGGAGGGGACAGAT**  
 119bp from chr19  
 25bp from chr19 inverted duplication from 29bp downstream of DSB  
 GCTCTGGTCTGGGTACTTTTATCT  
 94bp from chr19 directly upstream of DSB  
 GTCCTAACAGGAGGTGGGGTTAGACCCAATATCAGGAGACTAGGAAGGAGGAGGCCTAAGGATGGGGCTTTTCTGTCCCAATCC  
 TGTCCCTA

33  
**ATCGTTTTGGCCTCCCTATCAGTC**-1. **+134** ..-4..**CCACTGTGGGGTGGAGGGGACAGAT**  
 134bp from Homo sapiens chr16, alternate assembly HuRef  
 TGGCACGCGgCGGTACTGCCGGTGGTAGTAGTAATACCTGTTCTTTGCGTGTGCCGCTCTATAAATTCTGCAAAGACAAAGCCAC  
 AGACTCAAACGCCCTCATCGGTTTGGACAGGCTTTTAGCTTTTCTTATTTC  
 1  
**ATCGTTTTGGCCTCCCTATCAG**.-3.. **+233** ..-23.....ACAGAT  
 233bp from Human DNA sequence from clone RP11-335L15 on chromosome 9, complete  
 sequence  
**TCAG**ACTCTTCAACATAGCAAGTCCTTCCAGACAATTCCACTCCAATCATAAGGACCACTCCTTCCTCTAAGGATTCAAAGCACT  
 TTGTACTTATAGGGCTCTAGGGTACTGCCCTCACTCTATTGTTAATGGTATATATTTCTATCTCCCTCACTAGGCTTCCAACTA  
 TTTAAGAAAAGGAtGCATATTTTTACTCCTCTtTGTGTCTTACAGCACCTTCCACAGTGCCTGCAACA  
 32  
**ATCGTTTTGGCCTT**.....-10.. **+221** ..-63.....  
 221bp:  
 -133bp from Homo sapiens chr7, alternate assembly HuRef:  
**T**CAGGCCAGAGTGTGGGAAAGGCTCAAGGAATTAGAATTCTCACCTGATTGTGCCCCAGCTGTGGACCGTGGCTCGGCTTCCT  
 TTTCTCTATGATGACACAGTTGGGAAAGCTGCTCTCCAGGGTCCCCCG  
 -88bp from Homo sapiens chr10, alternate assembly HuRef  
 GCCACGGTGGGCCCTGTGACCCCTCTCTGCTGCGCAGAACC**TGGAGTACTGTATCATGGTCATTGGGGTCCCCAACGTGGGCA**  
**AGTCCT**

**HCT116 X4+/-**

---

|                                    |                                        |
|------------------------------------|----------------------------------------|
| <b>ATCGTTTTGGCCTCCCTATCAGTCATT</b> | <b>GTGGCCCCACTGTGGGGTGGAGGGGACAGAT</b> |
|------------------------------------|----------------------------------------|

---

34, 43, 49, 58, 61  
**ATCGTTTTGGCCTCCCTATCAGTCATT** ..\_GGCCCCACTGTGGGGTGGAGGGGACAGAT  
 50, 52, 60, 62  
**ATCGTTTTGGCCTCCCTATCAGTCAT.** ..\_GGCCCCACTGTGGGGTGGAGGGGACAGAT  
 41, 48  
**ATCGTTTTGGCCTCCCTATCAGTCAT.** ..-1GCC**CCACTGTGGGGTGGAGGGGACAGAT**  
 51  
**ATCGTTTTGGCCTCCCTATCAGT**-2.. **A** ..-1GCC**CCACTGTGGGGTGGAGGGGACAGAT**  
 35  
**ATCGTTTTGGCCTCCCTATCAGTCAT.** ..-11.....**GGGGTGGAGGGGACAGAT**  
 64  
**ATCGTTTTGGCCTCCC**.....-9.. ..GGCCCCACTGTGGGGTGGAGGGGACAGAT  
 45  
**ATCGTTTT**.....-18.. ..\_GGCCCCACTGTGGGGTGGAGGGGACAGAT  
 36  
**ATCGTTTTGGCCTCCCTAT**....-6.. ..-16.....GGAGGGGACAGAT  
 54  
**ATCGTTTTGGCCTCCCTATCAGTCATT** **GAAGCAACCGA** ..-41.....  
 44

```

ATCGTTTTTG.....-16..          A          ..-35.....
55
ATCGTTTTTGGCCTCCCTATC...-5..    ACATTGGCCCC          ..-62.....
46
.....-40..          AG          ..-29.....
57
AGTA.....-34..          ..-36.....
47
CAG.....-40          ..-31.....
37
ATCGTTTTTGG.....-15..          ..-103.....
56
.....-47..          +22          ..-115.....
+22bp : 17bp from Homo sapiens chromosome 8, clone CTD-2517M22, complete sequence
A-CTGCGGAGCCCTGATGG-CGGG
63
GT.....-266..          ..GGCCCCACTGTGGGGTGGAGGGGACAGAT
38
.....-311..          ..-324.....
40
ATCGTTTTTGGCCTCCCTATCAGTCATT          +276          GTGGCCCCACTGTGGGGTGGAGGGGACAGAT
+276bp from Homo sapiens chromosome 17, clone RP11-216P6
TCTCAGTTCTGATTCAGAGCATATACTGCCTCCTGCAGAACTCTGGCCAGCCCTGCAAGGCATCGCCACCCAGCTGGTGCTGTAG
TGGAGTCTTCAAAGGCCATTCCACCATCTTATCAAACCAGCTGCTCAAGATGGTGGGCAACATGGTTCGTACCGGGAATTCCAT
GAGCATGGGCTCGTTACCATACTTTCTTTGCTGTGAAGGGAGTTCCTCAGACAGAAGCAGTGCGGTGTGGCATAACCGTGACAGTAG
GTACGGCATTCTGTGAGT

```

**HCT116 X4-/-**

---

```

ATCGTTTTTGGCCTCCCTATCAGTCATT          GTGGCCCCACTGTGGGGTGGAGGGGACAGAT
94
ATCGTTTTTGGCCTCCC.....-9..          A          ..-3.CCCACTGTGGGGTGGAGGGGACAGAT
70
A.....-25..          ..-2CCCCACTGTGGGGTGGAGGGGACAGAT
76,89
CA.....-25..          ..-7.....CTGTGGGGTGGAGGGGACAGAT
80
ACA.....-25..          ..-26.....
91
ATCGTTTTTGGCCTCCCTAT.....-6..          ..-55.....
95
GT.....-46..          ..-16.....GGAGGGGACAGAT
79
CA.....-28..          ..-40.....
93
.....-41..          ACTT          ..-37.....
66
CAG.....-40..          ..-41.....
92
.....-48..          ..-49.....
87
GG.....-55..          ..-62.....
84
GT.....-83..          ..-35.....
85
CAG.....-40..          ..-87.....
68
GCCCTG.....-65..          ..-67.....
88
CA.....-41..          ..-97.....

```

```

82 TAC.....-103.. ..-37.....
77 .....-115.. T ..-68.....
73 .....-221.. T ..-8.....TGTGGGGTGGAGGGGACAGAT
71 ATCGTTTTTGGCCTCCCTATCAG.-3.. ..-232.....
83 TCC.....-145.. ..-129.....
74 GCC.....-277.. ..-64.....
65 GAG.....-36.. ..-337.....
75 GGA.....-52.. ..-330.....
81 ATC.....-23.. +56 ..-276.....
56bp: Inverted duplication from 2293bp upstream of DSB on chr19
CTGGACTTCGGCTTTTGTCCCCCAAGTTTTGGACCCTAAGGGAAGAATGAGAAAC
96 .....-220.. +37 ..-43.....

```

37bp: AGATTCATTATACAATGAATACATCATTGTCTTTGT

Part of the sequence may come from:

-18bp from Homo sapiens chr7, alternate assembly CHM1\_1.1

ATTCATTATACAATGAA

-16bp from Homo sapiens v-erb-b2 avian erythroblastic leukemia viral oncogene homolog 4 (ERBB4), RefSeqGene on chromosome 2

-ACATCATTGTCTTTGT



**Figure S3, related to Figure 3. Translocations induced by ZFN<sup>EWS</sup> and ZFN<sup>p84</sup> DSBs in pre-B cells and patient-derived cells.**

A. Indel formation: T7 assay on p84 locus after a ZFN<sup>p84</sup> DSB. Indel formation at the ZFN<sup>p84</sup> cleavage site, as monitored by the T7-endonuclease assay, in wild-type and LIG4 mutant pre-B cells and fibroblasts.

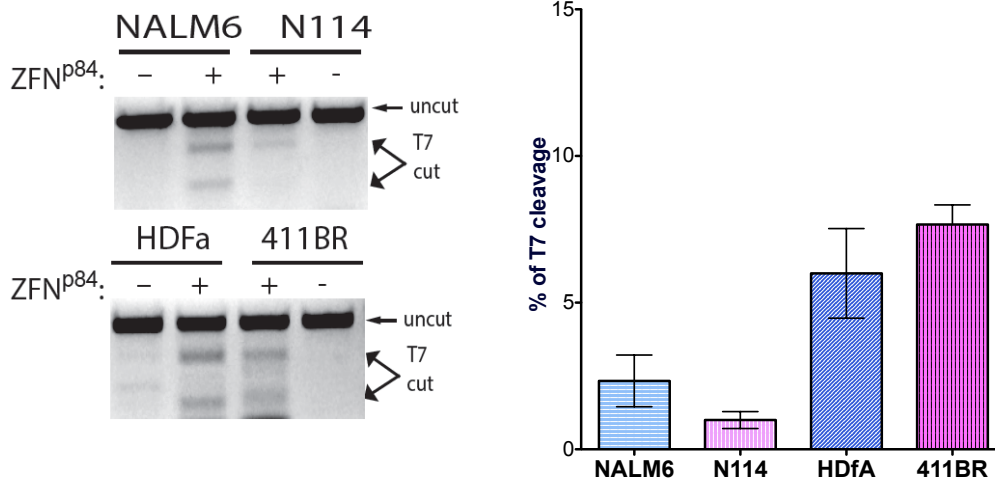

B. Translocation junction sequences from pre-B cells.

The ZFN recognition sequences at each DNA end are underlined; bps in italics represent the overhangs. The chromosome 19 end is in black and the chromosome 22 end is in red. Microhomologies (underlined), insertions (green) and lengths of deletions from each end are indicated.

### Der19

#### NALM6

| DNA ends:                          |       |                              |
|------------------------------------|-------|------------------------------|
| TCTGTCACCAATCCTGTCCCTAGTGGC        |       | GTCATTAATGTAAAGTGGGGAGGCAGCT |
| 11                                 |       |                              |
| TCTGTCACCAATCCTGTCCCTAGTGGC.       | TGGCG | GTCATTAATGTAAAGTGGGGAGGCAGCT |
| 5 bp from chr19 duplication TGGC G |       |                              |
| 14                                 |       |                              |
| TCTGTCACCAATCCTGTCCCTAGTGG..       | TT    | GTCATTAATGTAAAGTGGGGAGGCAGCT |
| 23                                 |       |                              |
| TCTGTCACCAATCCTGTCCCTAGTGGCC       | C     | ..-2TTAATGTAAAGTGGGGAGGCAGCT |
| 22,39                              |       |                              |
| TCTGTCACCAATCCTGTCCCTAG.-3..       | G     | GTCATTAATGTAAAGTGGGGAGGCAGCT |
| 37                                 |       |                              |
| TCTGTCACCAATCCTGTCCCTAG.-3..       | GG    | GTCATTAATGTAAAGTGGGGAGGCAGCT |
| 76                                 |       |                              |
| TCTGTCACCAATCCTGTCCCTAG.-3..       | AG    | GTCATTAATGTAAAGTGGGGAGGCAGCT |
| 3                                  |       |                              |
| TCTGTCACCAATCCTGTCCCTAG.-3..       | AAG   | GTCATTAATGTAAAGTGGGGAGGCAGCT |
| 10                                 |       |                              |
| TCTGTCACCAATCCTGTCCCTAG.-3..       | GCG   | GTCATTAATGTAAAGTGGGGAGGCAGCT |
| 8                                  |       |                              |
| TCTGTCACCAATCCTGTCCCTAG.-3..       | GCGC  | .TCATTAATGTAAAGTGGGGAGGCAGCT |
| 59                                 |       |                              |

|                                                                  |                 |                              |
|------------------------------------------------------------------|-----------------|------------------------------|
| TCTGTCACCAATCCTGTCCCTAG.-3..                                     | <b>GGA</b>      | .TCATTAATGTAAAGTGGGGAGGCAGCT |
| 33                                                               |                 |                              |
| TCTGTCACCAATCCTGTCCCTAG.-3..                                     | <b>GG</b>       | ..CATTAATGTAAAGTGGGGAGGCAGCT |
| 20                                                               |                 |                              |
| TCTGTCACCAATCCTGTCCCTAGTGGCC                                     | <b>TCG</b>      | ..-3.TAATGTAAAGTGGGGAGGCAGCT |
| 83                                                               |                 |                              |
| TCTGTCACCAATCCTGTCCCTAGTGGC.                                     | <b>GCC</b>      | ..-3.TAATGTAAAGTGGGGAGGCAGCT |
| 26                                                               |                 |                              |
| TCTGTCACCAATCCTGTCCCTAGTGGC.                                     | <b>GC</b>       | ..-3.TAATGTAAAGTGGGGAGGCAGCT |
| 35                                                               |                 |                              |
| TCTGTCACCAATCCTGTCCCTAGT-2..                                     | <b>TC</b>       | ..-2TTAATGTAAAGTGGGGAGGCAGCT |
| 42                                                               |                 |                              |
| TCTGTCACCAATCCTGTCCCT...-5..                                     | <b>GAGAG</b>    | GTCATTAATGTAAAGTGGGGAGGCAGCT |
| 68                                                               |                 |                              |
| TCTGTCACCAATCCTGTCCCTAGTGGC.                                     | <b>GCCCTGG</b>  | ..-6....TGTAAGTGGGGAGGCAGCT  |
| 72                                                               |                 |                              |
| TCTGTCACCAATCCTGTCC...-6..                                       | <b>CGGGA</b>    | GTCATTAATGTAAAGTGGGGAGGCAGCT |
| 2                                                                |                 |                              |
| TCTGTCACCAATCCTGTCC...-6..                                       | <b>CCCCA</b>    | ..-3.TAATGTAAAGTGGGGAGGCAGCT |
| 24                                                               |                 |                              |
| TCTGTCACCAATCCTGTCCCTA...-4..                                    |                 | ..-5...ATGTAAAGTGGGGAGGCAGCT |
| 12                                                               |                 |                              |
| TCTGTCACCAATCCTG.....-10..                                       | <b>CCTGGGAC</b> | .TCATTAATGTAAAGTGGGGAGGCAGCT |
| 60                                                               |                 |                              |
| TCTGTCACCAATCCTG.....-10..                                       | <b>AGGGGC</b>   | .TCATTAATGTAAAGTGGGGAGGCAGCT |
| 81                                                               |                 |                              |
| TCTGTCACCAATCCT.....-11..                                        | <b>CTGAAGCC</b> | .TCATTAATGTAAAGTGGGGAGGCAGCT |
| 44                                                               |                 |                              |
| TCTGTCACCAATC.....-13..                                          | <b>TAGGC</b>    | GTCATTAATGTAAAGTGGGGAGGCAGCT |
| 13                                                               |                 |                              |
| TCTGTCACCAATCCT.....-11..                                        | <b>TTCC</b>     | ..-3.TAATGTAAAGTGGGGAGGCAGCT |
| 18,32                                                            |                 |                              |
| TCTGTCACCAATCCT.....-11..                                        |                 | ..-4..AATGTAAAGTGGGGAGGCAGCT |
| 31                                                               |                 |                              |
| TCTGTCACCAATCC.....-12..                                         | <b>CGTCC</b>    | ..-3.TAATGTAAAGTGGGGAGGCAGCT |
| 21                                                               |                 |                              |
| TCTGTCACCAATCCTG.....-10..                                       | <b>+52</b>      | ..-9.....AAAGTGGGGAGGCAGCT   |
| 52bp inverted sequence located 11bp downstream of DSB from chr19 |                 |                              |
| GGCCGGTTAATGTGGCTCTGGTTCTGGGTACTTTTATCTGTCCCTCCACCCCA            |                 |                              |
| 16                                                               |                 |                              |
| TCTGTCAC.....-18..                                               | <b>TTTAC</b>    | ..-3.TAATGTAAAGTGGGGAGGCAGCT |
| 54                                                               |                 |                              |
| TCTG.....-22..                                                   | <b>CGA</b>      | ..-3.TAATGTAAAGTGGGGAGGCAGCT |
| 62                                                               |                 |                              |
| TCTGTCACCAATCCTG.....-10..                                       |                 | ..-20.....GCAGCT             |
| 67                                                               |                 |                              |
| .....-27..                                                       | <b>G</b>        | ..-3.TAATGTAAAGTGGGGAGGCAGCT |
| 34                                                               |                 |                              |
| TCTGTCACCAA.....-15..                                            | <b>CCT</b>      | ..-21.....CAGCT              |
| 43                                                               |                 |                              |
| .....-35..                                                       |                 | ..-13.....TGGGGAGGCAGCT      |
| 15                                                               |                 |                              |
| .....-32..                                                       |                 | ..-19.....GGCAGCT            |
| 53                                                               |                 |                              |
| .....-34..                                                       |                 | ..-19.....GGCAGCT            |
| 77                                                               |                 |                              |
| .....-31..                                                       | <b>TC</b>       | ..-33.....                   |
| 71                                                               |                 |                              |
| .....-56..                                                       |                 | ..-18.....AGGCAGCT           |
| 38                                                               |                 |                              |
| TG.....-33..                                                     |                 | ..-48.....                   |
| 40                                                               |                 |                              |
| .....-118..                                                      |                 | ..-19.....GGCAGCT            |
| 9                                                                |                 |                              |
| .....-139..                                                      |                 | ..-5...ATGTAAAGTGGGGAGGCAGCT |

36 TCTG.....-22.. CC ...-233.....

66 .....-289.. ..-12.....GTGGGGAGGCAGCT

6 .....-306.. +51+8 ...-23.....GCT

59bp: 51bp from chr22 17bp upstream of DSB  
CTGCTGTCTTTGGGGAAGTTGTATGCAGTGAGTAAATTCAACATCGTTTTTCGTTTG

75 .....-205.. C ...-3.TAATGTAAAGTGGGGAGGCAGCT

41 .....-57.. AAT ...-283.....

89 .....-413.. ..-11.....AGTGGGGAGGCAGCT

4 .....-256.. ..-119.....

79 TCTGTCACCAATCCTGTCCC....-6.. +229 ...-7.....GTAAAGTGGGGAGGCAGCT

229bp from chr19 17bp directly downstream of DSB  
CCCACTGTGGGGTGGAGGGGACAGATAAAAAGTACCCAGAACCAGAgCACATTAACCGGCCCTGGGAATATAAGGTGGTcCCAGCTC  
GGGGACACAGGATCCCTGGAGGCAGCAAACATGCTGTCTGAAGTGGACATAgGGGCCGGTTGGAGGAAGAAGACTAGCTGAGC  
TCTCGGACCCCTGGAAGATgC CATGACAGGGGCTGGAAGAGCTAGCACAGACTAGAGAGGTAA

**N114**

**TCTGTCACCAATCCTGTCCCTAGTGGCC**

**GTCATTAATGTAAAGTGGGGAGGCAGCT**

83 TCTGTC.....-20.. TG ...-8.....TAAAGTGGGGAGGCAGCT

59 TCTGTCAC.....-18.. ..-11.....AGTGGGGAGGCAGCT

64 TCTGTCACCAATCCT.....-11.. ..-26.....

58 TCTG.....-22.. ..-21.....CAGCT

71 .....-23.. ..-24.....CT

85 .....-29.. ..-19.....GGCAGCT

66 TT.....-25.. ..-29.....

61 .....-36.. GTGGG ...-23.....GCT

84 G.....-30.. ..-33.....

62,70 GGC.....-29.. ..-35.....

65 GG.....-30.. ..-34.....

88 GG.....-31.. ..-34.....

73 .....-30.. ..-39.....

76 CTA.....-39.. ..-40.....

87 .....-41.. ..-48.....

77 .....-29.. AA ...-64.....

80 AAG.....-37.. ..-57.....

55 .....-123.. ..CATTAATGTAAAGTGGGGAGGCAGCT

81

```

.....-80..          6+27+4          ..-57.....
37bp: 27 bp sequence from chr22 70bp upstream of DSB
CAGTCC ATCAGAAAAATGTTTTAGACTGCTAG TTTC
75
.....-137..          ..-12.....GTGGGGAGGCAGCT
74
TC.....-24..          +76          ..-126.....
76bp inverted sequence from chr22 20bp upstream of DSB
AACGATGTTGAATTTACTCACTGCATACAACCTCCCCAAAGACAGCAGGGCTAGCAGTCTAAACATTTTTTCTGATCA
60
A.....-60..          ..-106.....
92
GCAGG.....-243..          ..-34.....
57
TCTGTCACCAATCCT.....-11..          ..-288.....
78
AGA.....-107..          ..-256.....

```

## Der22

### NALM6

| <u>ATCGTTTTGGCCTCCCTATCAGTCATT</u> |                    | <u>GTGGCCCACTGTGGGGTGGAGGGGACAGAT</u> |
|------------------------------------|--------------------|---------------------------------------|
| 39                                 |                    |                                       |
| <u>ATCGTTTTGGCCTCCCTATCAGTCATT</u> |                    | ..GGCCCACTGTGGGGTGGAGGGGACAGAT        |
| 22,41                              |                    | ..-1GCCCACTGTGGGGTGGAGGGGACAGAT       |
| <u>ATCGTTTTGGCCTCCCTATCAGTCATT</u> |                    | ..-1GCCCACTGTGGGGTGGAGGGGACAGAT       |
| 44                                 |                    | ..TGGCCCACTGTGGGGTGGAGGGGACAGAT       |
| <u>ATCGTTTTGGCCTCCCTATCAGTCATT</u> | <b>GGA</b>         | ..TGGCCCACTGTGGGGTGGAGGGGACAGAT       |
| 1                                  |                    | ..GTGGCCCACTGTGGGGTGGAGGGGACAGAT      |
| <u>ATCGTTTTGGCCTCCCTATCAGTCATT</u> | <b>GGGGG</b>       | ..GTGGCCCACTGTGGGGTGGAGGGGACAGAT      |
| 46                                 |                    | ..GTGGCCCACTGTGGGGTGGAGGGGACAGAT      |
| <u>ATCGTTTTGGCCTCCCTATCAGTCATT</u> | <b>AA</b>          | ..GTGGCCCACTGTGGGGTGGAGGGGACAGAT      |
| 42                                 |                    | ..-5...CACTGTGGGGTGGAGGGGACAGAT       |
| <u>ATCGTTTTGGCCTCCCTATCAGTCATT</u> | <b>TAA</b>         | ..-5...CACTGTGGGGTGGAGGGGACAGAT       |
| 12                                 |                    | ..-3.CCCACTGTGGGGTGGAGGGGACAGAT       |
| <u>ATCGTTTTGGCCTCCCTATCAGTCATT</u> | <b>AT</b>          | ..-3.CCCACTGTGGGGTGGAGGGGACAGAT       |
| 34                                 |                    | ..-3.CCCACTGTGGGGTGGAGGGGACAGAT       |
| <u>ATCGTTTTGGCCTCCCTATCAGTCATT</u> | <b>G</b>           | ..-3.CCCACTGTGGGGTGGAGGGGACAGAT       |
| 3                                  |                    | ..-5...CACTGTGGGGTGGAGGGGACAGAT       |
| <u>ATCGTTTTGGCCTCCCTATCAGTCATT</u> |                    | ..-5...CACTGTGGGGTGGAGGGGACAGAT       |
| 7                                  |                    | ..-11.....GGGGTGGAGGGGACAGAT          |
| <u>ATCGTTTTGGCCTCCCTATCAGTCATT</u> | <b>TGGCCA</b>      | ..-11.....GGGGTGGAGGGGACAGAT          |
| 2                                  |                    | ..-5...CACTGTGGGGTGGAGGGGACAGAT       |
| <u>ATCGTTTTGGCCTCCCTATCAGTCATT</u> | <b>G</b>           | ..-5...CACTGTGGGGTGGAGGGGACAGAT       |
| 5                                  |                    | ..-4..CCACTGTGGGGTGGAGGGGACAGAT       |
| <u>ATCGTTTTGGCCTCCCTATCAGTCATT</u> | <b>T</b>           | ..-4..CCACTGTGGGGTGGAGGGGACAGAT       |
| 38                                 |                    | ..-5...CACTGTGGGGTGGAGGGGACAGAT       |
| <u>ATCGTTTTGGCCTCCCTATCAGTCATT</u> | <b>CTATGTCCCTA</b> | ..-5...CACTGTGGGGTGGAGGGGACAGAT       |
| 27                                 |                    | ..TGGCCCACTGTGGGGTGGAGGGGACAGAT       |
| <u>ATCGTTTTGGCCTCCCTATCAGTCATT</u> | <b>GTCGGCGAA</b>   | ..TGGCCCACTGTGGGGTGGAGGGGACAGAT       |
| 11                                 |                    | ..-5...CACTGTGGGGTGGAGGGGACAGAT       |
| <u>ATCGTTTTGGCCTCCCTATCAGTCATT</u> | <b>A</b>           | ..-5...CACTGTGGGGTGGAGGGGACAGAT       |
| 20,40                              |                    | ..-27.....                            |
| <u>ATCGTTTTGGCCTCCCTATCAGTCATT</u> |                    | ..-27.....                            |
| 29                                 |                    | ..-11.....GGGGTGGAGGGGACAGAT          |
| <u>ATCGTTTTGGCCTCCCTATCAGTCATT</u> |                    | ..-11.....GGGGTGGAGGGGACAGAT          |
| 33                                 |                    | ..-9.....GTGGGGTGGAGGGGACAGAT         |
| <u>ATCGTTTTGGCCTCCCTATCAGTCATT</u> | <b>CCC</b>         | ..-9.....GTGGGGTGGAGGGGACAGAT         |
| 45                                 |                    | ..-16.....GGAGGGGACAGAT               |
| <u>ATCGTTTTGGCCTCCCTATCAGTCATT</u> | <b>GATGGA</b>      | ..-16.....GGAGGGGACAGAT               |
| 37                                 |                    |                                       |

```

.....-30..          CA          ..-11.....GGGGTGGAGGGGACAGAT
8
ATCGTT.....-20..          ..-64.....
25
AGT.....-49..          ..-35.....
24
ATCGTTTTGGCC.....-13..          ..-148.....
30
ATCGTTTTGGCCTCCCTATCAG.-3..          ..-162.....
6
ATCGTTTTGGCCTCCCTATCAG.-3..          ..-242.....
48
.....-257..          CCTGG          ..-133.....
47
.....-46..          +5+31          ..-38.....
36bp: 31bp inverted sequence from 10bp downstream the DSB
GTCAC-CTGGGTACTTTTATCTGTCCCCTCCACCCA
31
ATCGTTTTGGCCTCCCTATCA.-4..          +47          ..-3.CCCACTGTGGGGTGGAGGGGACAGAT
47bp: 44bp from Homo sapiens caspase 8, apoptosis-related cysteine peptidase (CASP8),
RefSeqGene (LRG_34) on chromosome 2
CTGTGCCTGGCCATAATTCATTTATCAGTCATATATATACAC-GTC
13
ATCGTTT.....-18..          +539          ..-2CCCCTGTGGGGTGGAGGGGACAGAT
539bp from ZFNEW coding vector
GCGTTAAACTTAAGCTTATCCACTAGTCCAGTGTGGTGAATTCGCCATGGACTACAAAGACCATGACGGTGATTATAAAAAATCA
TGACATCGCTTACAAGGATGACGATGACAAGATGGCCCCAAGAAGAAGAGGAAGGTGGGCATCCACGGGTACCCGCCGCTATGG
CTGAGAGGCCCTTCCAGTGTGCAATCTGCATGCGTAAGTTTGCCAGTCCAACCACCGCAAGACCCATACCAAGATACACACGGGC
GAGAAGCCCTTCCAGTGTGCAATCTGCATGCGTAACTTCAGTGACCGCTCCGACCTGTCCCGCCACATCCGCACCCACACCGGCGA
GAAGCCTTTTGCTGTGACATTTGTGGGAGGAAATTTGCCCGCTCCGACAACCTGACCCGCCATACCAAGATACACACGGGCGGAG
GCGGATCTCAGAAGCCTTCCAGTGTGCAATCTGCATGCGTAACTTCAGTGCCTCGACTACCTGTCCACCCACATCCGCACCCACA
CGGCGAGAAGCCTTTGCCTGTG

```

**N114**

---

```

ATCGTTTTGGCCTCCCTATCAGTCATT          GTGGCCCCTGTGGGGTGGAGGGGACAGAT
79
ATCGTTTTGGCCTCCCTATC...-5..          ..-5...CACTGTGGGGTGGAGGGGACAGAT
85
ATCGTTTTGGCCTCCCT.....-8..          ..-9.....GTGGGGTGGAGGGGACAGAT
65
ATCGTTTTGG.....-15..          TGAACAT          ..-6...ACTGTGGGGTGGAGGGGACAGAT
68
ATCGTTTTGG.....-15..          ..-13.....GGTGGAGGGGACAGAT
93
ATC.....-23..          TGT          ..-5...CACTGTGGGGTGGAGGGGACAGAT
72
.....-28..          TAGTG          ..-5...CACTGTGGGGTGGAGGGGACAGAT
74
.....-30..          ..-4..CCACTGTGGGGTGGAGGGGACAGAT
87
ATCGTTTTGG.....-15..          ..-23.....ACAGAT
76
.....-41..          ..-9.....GTGGGGTGGAGGGGACAGAT
71
.....-53..          ..-10.....TGGGGTGGAGGGGACAGAT
73
AA.....-33..          ..-33.....
92
AGTA.....-34..          ..-36.....
83
ATT.....-30..          ..-56.....
77

```

GAA.....-51.. ..-43.....  
 69  
 .....-144.. ..-4.. **CCACTGTGGGGTGGAGGGGACAGAT**  
 75  
 .....-210.. ..-5... **CACTGTGGGGTGGAGGGGACAGAT**  
 90  
 .....-29.. **CCAA** ..-217.....  
 86  
 .....-163.. **TGCC** ..-102.....  
 70  
AGTGAG.....-36.. ..-279.....  
 88  
ATCGTTTTGG.....-15.. **A** ..-361.....  
 91  
ATCGTT.....-21.. **+90** ..-24.....CAGAT  
 90bp from TALEN expression vector  
 CGGCTATGACTGGGCACAACAGACAATCGGCTGCTCTGATGCCGCCGTTCGGCTGTCAGCGCAGGGGCGCCCGTTCTTTTTG  
 TCAA  
 67  
ATCGTTTTGGCCTCCCTATCAG.-3.. **+205** ..-35.....  
 205bp from Homo sapiens chr13, alternate assembly CHM1\_1.1  
 CAGGAATCAAATACAATCCAGATGAAAAAATGAAGAGATGAAC AAGGCCAAAGGCCACAGATGACATCCTCACAGAAAGACTGGC  
 TTTTGTGGGCCACCCAGATATCTGGCTCAGCATGTAAGAGTCAGCAATGCTGAGGAAACTGGTGCCTCGGCCAGGGTTTTGCCAA  
 GAGCAGGCTCAAAGTGTGGGCAAGAGAAAGAGAGACACA

### C. Translocation junction sequences from patient-derived cells.

#### Der19

#### HDFa

| <u>TCTGTCACCAATCCTGTCCCTAGTGGCC</u> | <u>GTCATTAATGTAAAGTGGGGAGGCAGCT</u> |
|-------------------------------------|-------------------------------------|
| 38,44                               |                                     |
| TCTGTCACCAATCCTGTCCCTAGTGGC.        | .TCATTAATGTAAAGTGGGGAGGCAGCT        |
| 10                                  |                                     |
| TCTGTCACCAATCCTGTCCCTAGTG-1.        | .TCATTAATGTAAAGTGGGGAGGCAGCT        |
| 11,46                               |                                     |
| TCTGTCACCAATCCTGTCCCTAGTGGC.        | .-1ATTAATGTAAAGTGGGGAGGCAGCT        |
| 6                                   |                                     |
| TCTGTCACCAATCCTGTCCCTAGT-2..        | .TCATTAATGTAAAGTGGGGAGGCAGCT        |
| 22,39,45,50                         |                                     |
| TCTGTCACCAATCCTGTCCCTAGT-2..        | ..CATTAATGTAAAGTGGGGAGGCAGCT        |
| 15                                  |                                     |
| TCTGTCACCAATCCTGTCCCTAGTGGC.        | .-3..TAATGTAAAGTGGGGAGGCAGCT        |
| 27                                  |                                     |
| TCTGTCACCAATCCTGTCCCTAGT-2..        | .-1ATTAATGTAAAGTGGGGAGGCAGCT        |
| 9                                   |                                     |
| TCTGTCACCAATCCTGTCCCTAGTG-1.        | ..-2TTAATGTAAAGTGGGGAGGCAGCT        |
| 23                                  |                                     |
| TCTGTCACCAATCCTGTCCCTAGTGGC.        | ..-3.TAATGTAAAGTGGGGAGGCAGCT        |
| 1                                   |                                     |
| TCTGTCACCAATCCTGTCCCTA..-4..        | ..CATTAATGTAAAGTGGGGAGGCAGCT        |
| 16                                  |                                     |
| TCTGTCACCAATCCTGTCCCTAGTGGC.        | ..-4..AATGTAAAGTGGGGAGGCAGCT        |
| 2                                   |                                     |
| TCTGTCACCAATCCTGTCCCTAGT-2..        | ..-3.TAATGTAAAGTGGGGAGGCAGCT        |
| 47                                  |                                     |
| TCTGTCACCAATCCTGTCCCTAGT-2..        | ..-3.TAATGTAAAGTGGGGAGGCAGCT        |
| 4                                   |                                     |
| TCTGTCACCAATCCTGTCCCTA..-4..        | ..-2TTAATGTAAAGTGGGGAGGCAGCT        |

|       |                               |                               |
|-------|-------------------------------|-------------------------------|
| 17    | TCTGTCACCAATCCTGTCCC.....-6.. | ..CATTAAATGTAAAGTGGGGAGGCAGCT |
| 5     | TCTGTCACCAATCCTGTCCCTA..-4..  | ..-3.TAATGTAAAGTGGGGAGGCAGCT  |
| 14,20 | TCTGTCACCAATCCTGTCCCTA..-4..  | ..-5...ATGTAAAGTGGGGAGGCAGCT  |
| 33    | TCTGTCACCAATCCTGTGC.....-8..  | ..-1ATTAATGTAAAGTGGGGAGGCAGCT |
| 12    | TCTGTCACCAATCCTGTCCCTAGTGG..  | ..-16.....GGAGGCAGCT          |
| 18    | TCTGTCACCAATC.....-13..       | ..-5...ATGTAAAGTGGGGAGGCAGCT  |
| 41    | .....-36..                    | ..-3.TAATGTAAAGTGGGGAGGCAGCT  |

**411BR**

**TCTGTCACCAATCCTGTCCCTAGTGGCC**

**GTCATTAAATGTAAAGTGGGGAGGCAGCT**

|               |                               |                                |
|---------------|-------------------------------|--------------------------------|
| 56            | TCTGTCACCAATCCTGTCCCTAGTGGC.  | ..TCATTAAATGTAAAGTGGGGAGGCAGCT |
| 22,63         | TCTGTCACCAATCCTGTCCCTAGT-2..  | ..CATTAAATGTAAAGTGGGGAGGCAGCT  |
| 65            | TCTGTCACCAATCCTGTCCCTAGTGGC.  | ..-2TTAATGTAAAGTGGGGAGGCAGCT   |
| 10            | TCTGTCACCAATCCTGTCCCTAGTG-1.  | ..-3.TAATGTAAAGTGGGGAGGCAGCT   |
| 84            | TCTGTCACCAATCCTGTCCCTAGT-2..  | ..-2TTAATGTAAAGTGGGGAGGCAGCT   |
| 91            | TCTGTCACCAATCCTGTCCC.....-6.. | ..-1ATTAATGTAAAGTGGGGAGGCAGCT  |
| 89            | TCTGTCACCAATCCTGTCCCTA..-4..  | ..-5...ATGTAAAGTGGGGAGGCAGCT   |
| 27,70         | TCTGTCACCAATCCTGTCCCTAGT-2..  | ..-9.....AAAGTGGGGAGGCAGCT     |
| 12            | TCTGTCACCAATCCTGTCCCTA..-4..  | ..-10.....AAGTGGGGAGGCAGCT     |
| 75            | TCTGTCACCAATCCTGTCCCTAGTG-1.  | ..-13.....GGGGAGGCAGCT         |
| 42,59         | TCTGTCACCAATCCTGTCCCTAGTGG..  | ..-15.....GGGAGGCAGCT          |
| 1,24,47,53,76 | TCTGTCACCAATCCTGTCCCTAGTGG..  | ..-16.....GGAGGCAGCT           |
| 13            | TCTGTCACC.....-17..           | GTCATAATGTAAAGTGGGGAGGCAGCT    |
| 17            | TCTGTCACCAATCCTGTCCCTA..-4..  | ..-12.....TGGGGAGGCAGCT        |
| 13            | TCTGTCACC.....-17..           | GTCATAATGTAAAGTGGGGAGGCAGCT    |
| 39            | TCTGTCACCAATCCTGT.....-9..    | ..-8.....TAAAGTGGGGAGGCAGCT    |
| 54            | TCTGTCACCAATCCTGT.....-9..    | ..-11.....GTGGGGAGGCAGCT       |
| 82            | TCTGTCACCAATCCTGTC.....-10..  | ..-10.....AAGTGGGGAGGCAGCT     |
| 11,73         | TCTGTCACCAAT.....-14..        | ..-7.....GTAAAGTGGGGAGGCAGCT   |
| 50            | TCTGTCA.....-19..             | ..-2TTAATGTAAAGTGGGGAGGCAGCT   |
| 32            | TCTGTCACCAATCCTGT.....-9..    | ..-13.....GGGGAGGCAGCT         |
| 92            | TCTGTCACCAATCC.....-12..      | ..-11.....AGTGGGGAGGCAGCT      |

ATA

A

G

|    |                              |   |                              |
|----|------------------------------|---|------------------------------|
| 38 | TCTGTCACCAATCCTG.....-10..   |   | ..-13.....GGGGAGGCAGCT       |
| 66 | TCTGTCACCAATCC.....-12..     | C | ..-12.....TGGGGAGGCAGCT      |
| 31 | TCTGTCAC.....-18..           |   | ..-8.....TAAAGTGGGGAGGCAGCT  |
| 3  | TCTGTCACCAATCCTGTCCCTAGTGGC. | A | ..-28.....                   |
| 33 | TCTGTCACCA.....-16..         |   | ..-14.....GGGGAGGCAGCT       |
| 81 | TCTGTCACCAAT.....-14..       |   | ..-16.....GGAGGCAGCT         |
| 88 | TCTGTCACCAATC.....-13..      |   | ..-27.....                   |
| 7  | .....-30..                   |   | ..-2TTAATGTAAAGTGGGGAGGCAGCT |
| 28 | TCTGTCACCA.....-16..         |   | ..-19.....GGCAGCT            |
| 29 | TC.....-24..                 |   | ..-11.....AGTGGGGAGGCAGCT    |
| 74 | .....-27..                   |   | ..-8.....TAAAGTGGGGAGGCAGCT  |
| 86 | T.....-25..                  |   | ..-10.....AAGTGGGGAGGCAGCT   |
| 23 | TCTGTCACC.....-17..          | C | ..-20.....GCAGCT             |
| 6  | T.....-25..                  |   | ..-14.....GGGGAGGCAGCT       |
| 67 | TCTGTCACCAATCCTG.....-10..   |   | ..-29.....                   |
| 78 | T.....-25..                  |   | ..-17.....GAGGCAGCT          |
| 51 | .....-37..                   |   | ..-22.....AGCT               |
| 46 | TCTGT.....-21..              |   | ..-167.....                  |
| 61 | .....-72..                   |   | ..-176.....                  |

**Der22**

**HDFa**

|                                    |                                         |
|------------------------------------|-----------------------------------------|
| <b>ATCGTTTTGGCCTCCCTATCAGTCATT</b> | <b>GTGGCCCACACTGTGGGGTGGAGGGGACAGAT</b> |
| 13                                 | GTGGCCCACACTGTGGGGTGGAGGGGACAGAT        |
| 83,7                               | .._GGCCCACACTGTGGGGTGGAGGGGACAGAT       |
| 5                                  | .._GGCCCACACTGTGGGGTGGAGGGGACAGAT       |
| 81,1,4                             | .._GGCCCACACTGTGGGGTGGAGGGGACAGAT       |
| 2                                  | ..-3.CCCACTGTGGGGTGGAGGGGACAGAT         |
| 10                                 | ..-1GCCCCACTGTGGGGTGGAGGGGACAGAT        |
| 82                                 | ..-3.CCCACTGTGGGGTGGAGGGGACAGAT         |
| 86                                 | ..-1GCCCCACTGTGGGGTGGAGGGGACAGAT        |
| 3                                  | ..-4..CCACTGTGGGGTGGAGGGGACAGAT         |
| 63                                 |                                         |



|                             |          |                                 |
|-----------------------------|----------|---------------------------------|
| ATCGTTTTGGCCTCCCTATCAG.-3.. |          | ..-3.CCCACTGTGGGGTGGAGGGGACAGAT |
| 62                          |          |                                 |
| ATCGTTTTGGCCTCCCTATC...-5.. |          | ..-5...CACTGTGGGGTGGAGGGGACAGAT |
| 69,77                       |          |                                 |
| ATCGTTTTGGCCTCCCTATCAGT-2.. |          | ..-9.....GTGGGGTGGAGGGGACAGAT   |
| 70                          |          |                                 |
| ATCGTTTTGGCCTCCCTAT....-6.. | <b>T</b> | ..-3.CCCACTGTGGGGTGGAGGGGACAGAT |
| 9                           |          |                                 |
| ATCGTTTTGGCCTCCCTA.....-7.. |          | ..-7.....CTGTGGGGTGGAGGGGACAGAT |
| 95                          |          |                                 |
| ATCGTTTTGGCCTCCCT.....-8..  |          | ..-10.....TGGGGTGGAGGGGACAGAT   |
| 91                          |          |                                 |
| ATCGTTTTGGCCTCCC.....-9..   |          | ..-3.CCCACTGTGGGGTGGAGGGGACAGAT |
| 61                          |          |                                 |
| ATCGTTTTGGCCTCCCTATCAG.-3.. |          | ..-21.....GGACAGAT              |
| 92                          |          |                                 |
| GC.....-42..                |          | ..-171.....                     |

**411BR**

|                                    |             |                                        |
|------------------------------------|-------------|----------------------------------------|
| <b>ATCGTTTTGGCCTCCCTATCAGTCATT</b> |             | <b>GTGGCCCCACTGTGGGGTGGAGGGGACAGAT</b> |
| 46                                 |             |                                        |
| ATCGTTTTGGCCTCCCTATCAGTC-1.        |             | ..-2CCCCACTGTGGGGTGGAGGGGACAGAT        |
| 8                                  |             |                                        |
| ATCGTTTTGGCCTCCCTATCAG.-3..        |             | ..-1GCCCCACTGTGGGGTGGAGGGGACAGAT       |
| 49                                 |             |                                        |
| ATCGTTTTGGCCTCCCTA.....-7..        |             | GTGGCCCCACTGTGGGGTGGAGGGGACAGAT        |
| 5,34                               |             |                                        |
| ATCGTTTTGGCCTCCCT.....-8..         |             | .._GGCCCCACTGTGGGGTGGAGGGGACAGAT       |
| 10,26,71                           |             |                                        |
| ATCGTTTTGGCCTCCCTATC...-5..        |             | ..-4..CCACTGTGGGGTGGAGGGGACAGAT        |
| 29                                 |             |                                        |
| ATCGTTTTGGCCTCCCTA.....-7..        | <b>CC</b>   | ..-2CCCCACTGTGGGGTGGAGGGGACAGAT        |
| 4                                  |             |                                        |
| ATCGTTTTGGCCTCC.....-10..          | <b>A</b>    | .TGGCCCCACTGTGGGGTGGAGGGGACAGAT        |
| 32                                 |             |                                        |
| ATCGTTTTGGCCTCCCTA.....-7..        | <b>G</b>    | ..-3.CCCACTGTGGGGTGGAGGGGACAGAT        |
| 54                                 |             |                                        |
| ATCGTTTTGGCCTCCC.....-9..          | <b>AG</b>   | ..-3.CCCACTGTGGGGTGGAGGGGACAGAT        |
| 60                                 |             |                                        |
| ATCGTTTTGGCCTCCC.....-9..          | <b>CCT</b>  | ..-3.CCCACTGTGGGGTGGAGGGGACAGAT        |
| 20                                 |             |                                        |
| ATCGTTTTGGCCTCCCTA.....-7..        | <b>GTGC</b> | ..-7.....CTGTGGGGTGGAGGGGACAGAT        |
| 48                                 |             |                                        |
| ATCGTTTTGGCCTCC.....-10..          |             | ..-6....ACTGTGGGGTGGAGGGGACAGAT        |
| 57                                 |             |                                        |
| ATCGTTTTGGCCTCCCTATCAGT-2..        |             | ..-16.....GGAGGGGACAGAT                |
| 58                                 |             |                                        |
| ATCGTTTTGGCCT.....-12..            |             | ..-8.....TGTGGGGTGGAGGGGACAGAT         |
| 41                                 |             |                                        |
| ATCG.....-21..                     | <b>A</b>    | ..GGCCCCACTGTGGGGTGGAGGGGACAGAT        |
| 70                                 |             |                                        |
| ATCGTTTTGGCCT.....-12..            |             | ..-9.....GTGGGGTGGAGGGGACAGAT          |
| 1                                  |             |                                        |
| ATCGTTTTGGCCTCCCTAT....-6..        | <b>A</b>    | ..-16.....GGAGGGGACAGAT                |
| 17,52,62                           |             |                                        |
| ATCGTTTTGGCCT.....-12..            |             | ..-11.....GGGGTGGAGGGGACAGAT           |
| 3                                  |             |                                        |
| ATCGTTTTGGCCTCCC.....-9..          |             | ..-15.....TGGAGGGGACAGAT               |
| 61                                 |             |                                        |
| ATCGTTTTGGCCTCC.....-10..          |             | ..-14.....GTGGAGGGGACAGAT              |

|       |                              |   |                                |
|-------|------------------------------|---|--------------------------------|
| 15    | ATCGTTTTTGG.....-15..        |   | ..-10.....TGGGGTGGAGGGGACAGAT  |
| 67    | ATCGTTTTTGGCCTCCC.....-9..   |   | ..-16.....GGAGGGGACAGAT        |
| 51,53 | ATCGTTTTTGGCCTCCCTA.....-7.. |   | ..-19.....GGGGACAGAT           |
| 27    | ATCGTTTTTGGCCTCCC.....-9..   |   | ..-21.....GGGGACAGAT           |
| 38    | ATCGTTTTTGGCCT.....-12..     |   | ..-18.....GGAGGGGACAGAT        |
| 25    | ATCGTTTTTGGCCT.....-12..     |   | ..-20.....AGGGGACAGAT          |
| 47    | ATCGTTTTTGGCCTC.....-11..    |   | ..-21.....GGGGACAGAT           |
| 68    | ATCGTTTTTGGCCT.....-12..     | A | ..-20.....AGGGGACAGAT          |
| 21    | ATCGTTTTTGGCCT.....-12..     |   | ..-25.....AGAT                 |
| 69    | ATCGTTTTTGGCCTCCC.....-9..   | C | ..-31.....                     |
| 65    | .....-43..                   |   | ..-8.....TGTGGGGTGGAGGGGACAGAT |
| 36    | ATCGT.....-21..              |   | ..-31.....                     |
| 33    | ATCG.....-21..               |   | ..-47.....                     |
| 55    | A.....-27..                  |   | ..-48.....                     |
| 50    | .....-74..                   |   | ..-11.....GGGGTGGAGGGGACAGAT   |
| 12    | G.....-47..                  |   | ..-41.....                     |
| 19    | ATCGT.....-21..              |   | ..-68.....                     |
| 37    | .....-49..                   |   | ..-45.....                     |
| 11    | .....-57..                   | A | ..-44.....                     |
| 45    | ATCGTTTTTGG.....-15..        |   | ..-358.....                    |

**Figure S4, related to Figure 4. DSBs induced by TALENs, wild-type Cas9, and paired nCas.**

A. Relative positions of nCas9 cleavage sites. nCas9 gives rise to DSBs with 5' overhangs that are 41 bp (NPM1+NPM2) and 37 bp (ALK1+ALK2) apart. PAM sequences are underlined; bps in italics represent overhangs.

**nCas9 : Sequence after nicking both strands :**

**CCTCGA** **GTAACCCTAATCTGATCACGGTCGGTCCATTGCATAGAGGAGG**  
**GGAGCT**TGACGATGACCCAAGTGGAGTCGGAGACCTTATCGATCTTG **TCCTCC**

Wild-type Cas9 gives rise to DSBs with blunt ends or short overhangs. The TAL<sup>ALK</sup> and TAL<sup>NPM</sup> cleavage sites are between the positions of the two nicks and have short 5' overhangs (Piganeau et al., 2013).

B. Indel formation at the ALK locus after a TAL<sup>ALK</sup>, Cas9(ALK1) or nCas9(ALK1+ALK2) DSB.

T7 endonuclease assay.

Number of experiments : n = 4 for TAL wt, n = 8 for het and mutant TAL (4 each for X4 and L4); n = 3 for Cas9 ; n = 4 for nCas9.

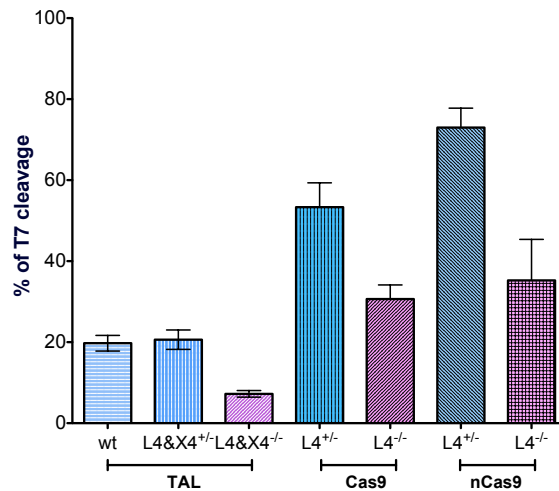

**Figure S5, related to Figure 5. NPM-ALK cancer translocation junctions induced by TALENs, wild-type Cas9, and paired nCas.**

A. Nuclease expression is quantified after 48 h by Western blotting for the HA epitope for TALEN or GFP expression for Cas9 and nCas9. The same blot was used to probe for both HA and tubulin.

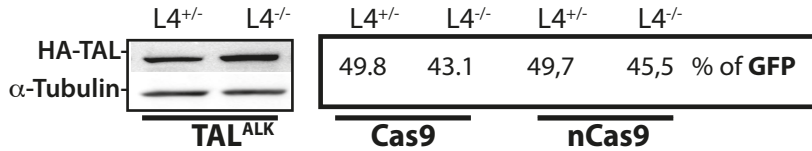

B. Translocation junction sequences from TALENs. The TALEN recognition sequences at each DNA end are underlined; bps in italics represent the overhangs. The chromosome 5 end is in black and the chromosome 2 end is in red. Microhomologies (underlined), insertions (green) and lengths of deletions from each end are indicated.

**Der5**

**HCT116 X4+/-**

| DNA ends:                                  |                                                                                                |            |                                         |
|--------------------------------------------|------------------------------------------------------------------------------------------------|------------|-----------------------------------------|
| <u>GCTATATCCTCGAACTGCTACTGGGTTC</u> (CCT C |                                                                                                |            | <u>A)ATCTGATCACGGTCGGTCCATTGCATAGAG</u> |
| 65                                         | GCTATATCCTCGAACTGCTACTGGGTTC...                                                                | <b>AC</b>  | ..TCTGATCACGGTCGGTCCATTGCATAGAG         |
| 56                                         | GCTATATCCTCGAACTGCTACTGGGTTC...                                                                |            | .....GATCACGGTCGGTCCATTGCATAGAG         |
| 57                                         | GCTATATCCTCGAACTGCTACTGGGTTC....                                                               | <b>C</b>   | ..TCTGATCACGGTCGGTCCATTGCATAGAG         |
| 60                                         | GCTATATCCTCGAACTGCTACTGGGT.....                                                                | <b>AG</b>  | .ATCTGATCACGGTCGGTCCATTGCATAGAG         |
| 55                                         | GCTATATCCTCGAACTGCTACTGGGT.....                                                                | <b>GGA</b> | .....GATCACGGTCGGTCCATTGCATAGAG         |
| 61                                         | GCTATATCCTCGAACTGCTACTGGGTTC...                                                                | <b>+40</b> | <b>AATCTGATCACGGTCGGTCCATTGCATAGAG</b>  |
|                                            | 40bp: from chr11 (Homo sapiens genomic DNA, chromosome 11q, clone:CMB9-3I4, complete sequence) |            |                                         |
|                                            | TTCCAGCGATCCTCCTACCTCGGCTTCCAAAATGCTGAG                                                        |            |                                         |
| 62                                         | GCTATATCCTCGAACTGCTACTGGG-1.....                                                               | <b>CTA</b> | .....-8.....TCGGTCCATTGCATAGAG          |
| 58                                         | GCTATATCCTCGAAC.....-11.....                                                                   | <b>CCT</b> | .....-1ATCACGGTCGGTCCATTGCATAGAG        |
| 63                                         | GCTATATCCTCGAACTGCTA....-6.....                                                                | <b>+13</b> | .....-11.....GTCCATTGCATAGAG            |
|                                            | 13bp: ACGCCAGCAACGC                                                                            |            |                                         |
| 66                                         | GCTATATC.....-18.....                                                                          |            | .....-6....GGTCGGTCCATTGCATAGAG         |
| 70                                         | GCTATATCCTCGAACTGCTACTGGGT.....                                                                |            | .....-25.....G                          |
| 67                                         | .....-27.....                                                                                  | <b>A</b>   | ....TGATCACGGTCGGTCCATTGCATAGAG         |
| 71                                         |                                                                                                |            |                                         |

GCTATATCCTCGAACTGCTACTGGGTTCA... ..-27.....  
59 GCTATA.....-20..... ..-25.....G  
64 .....-47..... ..-11.....GTCCATTGCATAGAG  
53 G.....-41..... ..-49.....  
52 G.....-43..... ..-85.....  
72 .....-102..... **TGTT** ..-83.....  
69 .....-203..... **+14** .....GATCACGGTCGGTCCATTGCATAGAG  
14bp: insertion of telomeric sequence:  
TTAGGG-TTAGGG-TA  
(Sequence upstream of insertion TAGAGAAGGG)  
50 C.....-56..... ..-306.....

**HCT116 L4+/-**

| <b>GCTATATCCTCGAACTGCTACTGGGTCA (CCT C</b>                                                                                                                      |                   | <b>A) ATCTGATCACGGTCGGTCCATTGCATAGAG</b> |
|-----------------------------------------------------------------------------------------------------------------------------------------------------------------|-------------------|------------------------------------------|
| 27 GCTATATCCTCGAACTGCTACTGGGT <u>TCACCT</u>                                                                                                                     |                   | .....GATCACGGTCGGTCCATTGCATAGAG          |
| 44 GCTATATCCTCGAACTGCTACTGGGT <u>TCA</u> ...                                                                                                                    |                   | ..ATCTGATCACGGTCGGTCCATTGCATAGAG         |
| 28 GCTATATCCTCGAACTGCTACTGGGT <u>TCA</u> ...                                                                                                                    | <b>TAATA</b>      | .....-1ATCACGGTCGGTCCATTGCATAGAG         |
| 26,32 GCTATATCCTCGAACTGCTACTGGGT.....                                                                                                                           |                   | .....-2 <u>TCACGGTCGGTCCATTGCATAGAG</u>  |
| 39 GCTATATCCTCGAACTGCTA....-6.....                                                                                                                              | <b>TGA</b>        | ....TGATCACGGTCGGTCCATTGCATAGAG          |
| 33 GCTATATCCTCGAACTGCTA....-6.....                                                                                                                              |                   | .....-1ATCACGGTCGGTCCATTGCATAGAG         |
| 35 GCTATATCCTCGAACTGCTACTGGGT <u>TC</u> ....                                                                                                                    |                   | .....-7.....GTCGGTCCATTGCATAGAG          |
| 47 GCTATATCCTCGAACTGCTACTGG-2.....                                                                                                                              |                   | .....-8.....TCGGTCCATTGCATAGAG           |
| 48 GCTATATCCTCGA.....-13.....                                                                                                                                   |                   | ....TGATCACGGTCGGTCCATTGCATAGAG          |
| 36 GCTATATCCTCGAACTGCTACTGGGT <u>TCACC</u> .                                                                                                                    | <b>CACCTC</b>     | .....-19.....CATAGAG                     |
| 25 GCTATAT <u>CC</u> .....-17.....                                                                                                                              |                   | .....-15.....ATTGCATAGAG                 |
| 31 GCTATATCCTCG.....-14.....                                                                                                                                    | <b>T</b>          | .....-19.....CATAGAG                     |
| 30 .....-24.....                                                                                                                                                |                   | .....-16..... <u>TTGCATAGAG</u>          |
| 37 GCTATAT.....-19.....                                                                                                                                         |                   | .....-43.....                            |
| 42 <u>CT</u> .....-52.....                                                                                                                                      |                   | .....-54.....                            |
| 34 .....-56.....                                                                                                                                                | <b>CCC</b>        | .....-70.....                            |
| 38 GCTATATCCTCGAACTGCTACTGGGT <u>TCACCTC</u>                                                                                                                    | <b>AGCCTCTGAA</b> | .....-183.....                           |
| 41 GCTATATCCTCGAACTGCTACTGGGT <u>TCACC</u> .                                                                                                                    | <b>+116</b>       | .....GATCACGGTCGGTCCATTGCATAGAG          |
| 116bp from TALEN expression vector<br>CAATGGAAAAGTCCCTATTGGCGTTACTATGGGAACATACGTCAATTATTGACGTCAATGGGCGGGGTCGTTGGGCGGTCAGCCAGG<br>CGGGCCATTTACCGTAAGTTATGTAACGCG |                   |                                          |

**HCT116 X4-/-**

| <b>GCTATATCCTCGAACTGCTACTGGGTTCAC (CCT C</b>                          |                    | <b>A) ATCTGATCACGGTCGGTCCATTGCATAGAG</b> |
|-----------------------------------------------------------------------|--------------------|------------------------------------------|
| 80<br>GCTATATCCTCGAACTGCTAC...-5.....                                 | <b>AG</b>          | .....-4..ACGGTCGGTCCATTGCATAGAG          |
| 79<br>GCTATATCCTCGAACTGCTACTG.-3.....                                 | <b>C</b>           | .....-9.....CGGTCCATTGCATAGAG            |
| 74<br>GCTATATCCTCGAACTGCTACTGGGTTCAC..                                | <b>AC</b>          | .....-43.....                            |
| 76<br>.....-34.....                                                   |                    | .....-19.....CATAGAG                     |
| 86<br>.....-50.....                                                   |                    | .....-5...CGGTCCATTGCATAGAG              |
| 84<br>.....-34.....                                                   |                    | .....-32.....                            |
| 77<br>AG.....-43.....                                                 |                    | .....-45.....                            |
| 90<br>.....-52.....                                                   |                    | .....-52.....                            |
| 81<br>TG.....-41.....                                                 |                    | .....-65.....                            |
| 75<br>.....-56.....                                                   | <b>AGT</b>         | .....-52.....                            |
| 95<br>GCTATATCCTCGAA.....-12.....                                     | <b>ATCCACTATAT</b> | .....-106.....                           |
| 83<br>.....-181.....                                                  |                    | .....GATCACGGTCGGTCCATTGCATAGAG          |
| 94<br>.....-225.....                                                  |                    | .....-2TCACGGTCGGTCCATTGCATAGAG          |
| 96<br>GCTATATCCTCGAACT.....-10.....                                   |                    | .....-254.....                           |
| 93<br>.....-217.....                                                  | <b>+28</b>         | .....-86.....                            |
| <b>28bp:</b>                                                          |                    |                                          |
| TTAGTAGC-TTTACACACAGTTTTCTGTA                                         |                    |                                          |
| 20bp from Homo sapiens BAC clone RP11-402C9 from 4, complete sequence |                    |                                          |
| TTTACACACAGTTTTCTGTA                                                  |                    |                                          |
| 78<br>CC.....-94.....                                                 |                    | .....-338.....                           |
| 87<br>.....-32.....                                                   | <b>CGTT</b>        | .....-475.....                           |

**HCT116 L4-/-**

| <b>GCTATATCCTCGAACTGCTACTGGGTTCAC (CCT C</b>  |              | <b>A) ATCTGATCACGGTCGGTCCATTGCATAGAG</b> |
|-----------------------------------------------|--------------|------------------------------------------|
| 81<br>GCTATATCCTCGAACTGCTACTGGGTTCAC..        |              | .....-6....GGTCGGTCCATTGCATAGAG          |
| 56<br>GCTATATCCTCGAACTGCTAC...-5.....         |              | .....-4..ACGGTCGGTCCATTGCATAGAG          |
| 49,51<br>GCTATATCCTCGAACTGCTACTGGGT.....      |              | .....-9.....CGGTCCATTGCATAGAG            |
| 70<br>GCTATATCCTCGAACTGCTACTG.-3.....         | <b>CTACT</b> | .....-6....GGTCGGTCCATTGCATAGAG          |
| 5 bp duplication from upstream of DSB on chr5 |              |                                          |
| 62<br>GCTATATCCTCGAAC.....-11.....            |              | .....-6....GGTCGGTCCATTGCATAGAG          |

|    |                                                                         |               |                                    |
|----|-------------------------------------------------------------------------|---------------|------------------------------------|
| 76 | GCT.....-23.....                                                        | <b>AA</b>     | .....TGATCACGGTCGGTCCATTGCATAGAG   |
| 71 | GCTATATCCTCG.....-14.....                                               |               | .....-11.....GTCCATTGCATAGAG       |
| 63 | GCTATATCCTCGAACTGCTA.....-6.....                                        |               | .....-43.....                      |
| 74 | GCTATATCCTCGAACTGCTACTGG-1.....                                         |               | .....-48.....                      |
| 60 | .....-36.....                                                           | <b>TAA</b>    | .....-15.....ATTGCATAGAG           |
| 58 | .....-58.....                                                           |               | .....-4.....ACGGTCGGTCCATTGCATAGAG |
| 54 | AGC.....-28.....                                                        |               | .....-39.....                      |
| 50 | .....-54.....                                                           | <b>GTCA</b>   | .....-54.....                      |
| 82 | G.....-68.....                                                          |               | .....-50.....                      |
| 72 | GGCTGG.....-50.....                                                     |               | .....-85.....                      |
| 83 | TGCC.....-85.....                                                       |               | .....-61.....                      |
| 69 | .....-171.....                                                          |               | .....-2TCACGGTCGGTCCATTGCATAGAG    |
| 65 | G.....-128.....                                                         |               | .....-48.....                      |
| 68 | .....-41.....                                                           |               | .....-150.....                     |
| 67 | GG.....-94.....                                                         |               | .....-107.....                     |
| 59 | CCTGGCC.....-163.....                                                   |               | .....-68.....                      |
| 64 | CTG.....-261.....                                                       |               | .....-35.....                      |
| 53 | GCTATATCCTC.....-15.....                                                |               | .....-363.....                     |
| 85 | .....-100.....                                                          | <b>A</b>      | .....-309.....                     |
| 77 | GCT.....-126.....                                                       |               | .....-373.....                     |
| 80 | G.....-36.....                                                          |               | .....-468.....                     |
| 79 | .....-212.....                                                          | <b>GTG</b>    | .....-352.....                     |
| 84 | GCTATATCCTC.....-16.....                                                | <b>+10</b>    | .....-506.....                     |
|    | 10bp insertion                                                          |               |                                    |
|    | AAATCCA                                                                 |               |                                    |
| 61 | .....-29.....                                                           | <b>+19</b>    | .....-11.....TCCATTGCATAGAG        |
|    | Insertion 19bp : 18bp from chromosome X clone RP11-366F6 map q28        |               |                                    |
|    | AATGAATAGTTCTAGCTAT                                                     |               |                                    |
| 73 | GCT.....-23.....                                                        | <b>+69+2</b>  | .....-35.....AG                    |
|    | Insertion 71bp                                                          |               |                                    |
|    | 69bp insertion from 16 bp downstream of DSB on chr5                     |               |                                    |
|    | AGAACTACAGGCACACTCCACGCCTGGCTAATTTTTTTTGTATATGTGCAGATGGGGTCTCAGTATGTTCT |               |                                    |
| 66 | GCT.....-32.....                                                        | <b>1+49+1</b> | .....-37.....                      |
|    | Insertion 51bp                                                          |               |                                    |
|    | 49 bp insertion inverted from 37 bp downstream of DSB on chr5           |               |                                    |
|    | CCAACATACTGAGACCCCATCTGCACATATACAAAAAATTAGCCAGGCT                       |               |                                    |
| 78 | .....-28.....                                                           | <b>+516</b>   | .....-18.....GCATAGAG              |

516bp insertion from 829bp upstream of DSB on chr2  
 CTGCCACTCTCGCTGATCCTCTCTGTGGTGACCTCTGCCCTCGTGGCCGCCCTGGTCTGGCTTTCTCCGGCATCATGATTGGTGA  
 GTGCACAGAGCCCCAGGGACTCCCAAGGGGGCAGGAAGGCAGGACTGAATAGTGTCTCAGGCTGTGCCACAGGTGCCAAGGTGTCA  
 CTTTCGTTATGCTAGTCCCTGGAATTGGGTGGGGTGGTATTAGGGCAGCCAGGCCAAGCCAAAACGGAAGCTCCCAACCTCCCC  
 CCACCAGAGCAGCTGCAGTTCCCTGAGGAGCCCCGATTCTGCACCTCAGCCCCGTGTGTATCCTCTGGCTGATCAGGGGGTGGG  
 GAGCTCCTTCAGTGTCCATCACGATGGTGAAAGCTCGCCCCACCCTAGACGTCACTTCTAGCTCCACATGCTTCCACCGGCGC  
 AGCTCCTGTTTGGCTCCCACCCTATGTAATGCAC TAGCCACTCTCCCCAAACCAGCCCTCCACCACCATCCAGGCATAGAGGAG

C. Translocation junction sequences from wild-type Cas9. The PAM sequence is underlined; bp in italics represents a possible overhang.

**Der5**

**HCT116 L4+/-**

| DNA ends:                                                                             |                                        |
|---------------------------------------------------------------------------------------|----------------------------------------|
| <b>GCAGTGATGTGATCATAGCTTGCATATATCCTCGAA</b>                                           | <b>GTAACCCTAATCTGATCACGGTCGGTCCATT</b> |
| 1, 10, 12, 14, 17, 23, 38, 39, 41, 45, 48                                             |                                        |
| GCAGTGATGTGATCATAGCTTGCATATATCCTCGAA                                                  | GTAACCCTAATCTGATCACGGTCGGTCCATT        |
| 42                                                                                    |                                        |
| GCAGTGATGTGATCATAGCTTGCATATATCCTCGA.                                                  | GTAACCCTAATCTGATCACGGTCGGTCCATT        |
| 2, 3, 9                                                                               |                                        |
| GCAGTGATGTGATCATAGCTTGCATATATCCTCGAA                                                  | -1TAACCCTAATCTGATCACGGTCGGTCCATT       |
| 37, 43                                                                                |                                        |
| GCAGTGATGTGATCATAGCTTGCATATATCCTCGA.                                                  | -2.AACCCTAATCTGATCACGGTCGGTCCATT       |
| 31                                                                                    |                                        |
| GCAGTGATGTGATCATAGCTTGCATATATCCTCGAA                                                  | -4...CCCTAATCTGATCACGGTCGGTCCATT       |
| 7                                                                                     |                                        |
| GCAGTGATGTGATCATAGCTTG.....-12.                                                       | GTAACCCTAATCTGATCACGGTCGGTCCATT        |
| 24                                                                                    |                                        |
| GCAGTGATGTGATCATAGCTTGCATATATCCTCGAA                                                  | -14.....ATCACGGTCGGTCCATT              |
| 25                                                                                    |                                        |
| GCAGTGATGTGATCATAG.....-16.                                                           | GTAACCCTAATCTGATCACGGTCGGTCCATT        |
| 44                                                                                    |                                        |
| GCAGTGATGTGATCATAGCTTGCATATATC...-5.                                                  | -11.....CTGATCACGGTCGGTCCATT           |
| 8                                                                                     |                                        |
| GCAGTGATGTGATCATAG.....-16.                                                           | -1TAACCCTAATCTGATCACGGTCGGTCCATT       |
| 20                                                                                    |                                        |
| GCAGTGATGTGATCA.....-19.                                                              | -18.....CGGTCGGTCCATT                  |
| 28                                                                                    |                                        |
| GCAGTGATGTGATC.....-20.                                                               | -22.....GGTCCATT                       |
| 47                                                                                    |                                        |
| .....-48.                                                                             | -20.....TCGGTCCATT                     |
| 32                                                                                    |                                        |
| GC.....-151.                                                                          | -215.....                              |
| 11                                                                                    |                                        |
| .....-248.                                                                            | -126.....                              |
| 145bp insertion with 107bp inverted duplication from chr5 36bp upstream DSB           |                                        |
| AGGTAGAAGGCTGGAG-                                                                     |                                        |
| TCCAGCCGTTATAATGAGACTGTCTTTATTAATAATAATTTTTAGGCCAGGCACAGTGGCTGACACGTGTAATACTAGCACTTTG |                                        |
| AGAGGcCAGGGCGTGCAGATCACGTTAAGGCCAGGAGTTCAAG                                           |                                        |

**HCT116 L4-/-**

| DNA ends:                                   |                                        |
|---------------------------------------------|----------------------------------------|
| <b>GCAGTGATGTGATCATAGCTTGCATATATCCTCGAA</b> | <b>GTAACCCTAATCTGATCACGGTCGGTCCATT</b> |
| 5                                           |                                        |
| GCAGTGATGTGATCA.....-19.                    | -18.....CGGTCGGTCCATT                  |
| 20                                          |                                        |
| GCAGTGAT.....-26.                           | -11.....CTGATCACGGTCGGTCCATT           |



```

32 GCAGTGATG.....-25. -14.....ATCACGGTCGGTCCATT
45 .....-45. -17.....ACGGTCGGTCCATT
41 GC.....-32. -80.....
19 A.....-81. -36.....
15 TAG.....-111. -37.....
33 .....-154. -5...CCTAATCTGATCACGGTCGGTCCATT
30 .....-170. -5...CCTAATCTGATCACGGTCGGTCCATT
40 GCAGTGATGTGATCATAGCTTGCTATAT....-6. +74 -195.....
27bp inverted sequence on chr5 51bp downstream of DSB
GACCCGAATGGCTGGGCAACATACTGAGACCCCATCTGCACATATACAAAAAATTAGCCAGGCGTGGAGTGT
7 GCAGTGATGTGATCATAGCTTGCTATATC...-5. AC -220.....
35 TCT.....-122. -117.....
27 GCAGTG.....-28. -253.....
42 GCAC.....-231. -54.....
10 C.....-81. -230.....
24 TT.....-186. -135.....
11 GC.....-279. -80.....
29 .....-57. -317.....
36 GCAGTGATG.....-25. +27 -369.....
27bp inverted duplication on chr2 6bp downstream of DSB
CAATGGACCGACCGTGATCAGATTAG
21 GC.....-81. -318.....
12 GCAG.....-30. -419.....
48 TC.....-304. -148.....
26 TCACT.....-301. -201.....
8 GTT.....-217. -296.....
46 .....-277. +17 -331.....
17bp: CTGCCCTTCTTTAAAAAT
1 .....-90. +352 -449.....
352bp inverted duplication from chr2, 27bp downstream of DSB
CTGAGCCATGAGGACCAGGTCACAGGACCTCTTTGGACTGCAGTTTCCTCTCTGTAGGCAGGGATGGTAACTCCTGCCCTGTTTC
CCTAACCGCTGCCACTCCCACCCTCTAGGGTTGTCATGAAATGAATTCACCAACATAAAATGGTTTTGAAAAATCCTAAAGAGC
TCTACCAATGTGAGTGACCATTATCACTCCTACATGTGAGGATGTCTGGAAGGCAAATCCATGGAAGCCAGAACAAAATTGTGA
TTCAGTGGGTAGATTCTGTGTGTAAAGCCAGCCCCCAACACATGGGCCAGGGCAAATGAgTCACCCGCTATGTGCTCAGTTCCC
TCCTCTATGCAATG

```

D. Translocation junction sequences from nCas9.

Der5

HCT116 L4+/-

DNA ends:

|                                                                                                             |                                             |
|-------------------------------------------------------------------------------------------------------------|---------------------------------------------|
| CTCGAACTGCTACTGGGTTACCTCAGCCTCTGGAATAGCTAGAAC                                                               | GTAACCCTAATCTGATCACGGTCGGTCCATTGCATAGAGGAG  |
| 51<br>CTCGAACTGCTACTGGGTTACCTCAGCCTCTGGAATAGCT...-5                                                         | -10.....TCTGATCACGGTCGGTCCATTGCATAGAGGAG    |
| 61<br>CTCGAACTGCTACTGGGTTACCTCAGCCTCTGGAATAGCT...-5                                                         | -13.....GATCACGGTCGGTCCATTGCATAGAGGAG       |
| 76<br>CTCGAACTGCTACTGGGTTACCTCAGCCTCTG.....-13                                                              | -8.....AATCTGATCACGGTCGGTCCATTGCATAGAGGAG   |
| 21<br>CTCGAACTGCTACTGGGTTACCTCAGCCTCTGGAATAGCTAGAAC                                                         | -24.....GTCCATTGCATAGAGGAG                  |
| 75<br>CTCGAACTGCTAC.....-33                                                                                 | -4..CCCTAATCTGATCACGGTCGGTCCATTGCATAGAGGAG  |
| 9<br>CTCGAACTGC.....-36                                                                                     | -2AACCCCTAATCTGATCACGGTCGGTCCATTGCATAGAGGAG |
| 25<br>CTCGAACTGCTACTGGGTTACCTCAGCCTC.....-15                                                                | -26.....CCATTGCATAGAGGAG                    |
| 31<br>CTCGAACTGCTACTGGGTTACCTCAGCCTCTGGAATA.....-8                                                          | -26.....CCATTGCATAGAGGAG                    |
| 14, 43<br>CTCGAACTGCTACTGGGTTACCTCAGCCTCTGGAATAG.....-7                                                     | -37.....AGGAG                               |
| 34<br>CTCGAACTGCTACTGGGTTACCTCAGCC.....-17                                                                  | -28.....ATTGCATAGAGGAG                      |
| 3<br>CTCGAACTGCTACTGGGTTACCTCAGCCTCTGGAATAGCTAGAAC                                                          | -47.....-10...                              |
| 45<br>CTCGAACTGCTACTGGGTTACCTCAGCCTCTGGAATAGCTA...-4+31                                                     | -43.....-6....                              |
| 31bp from chr2, from 5bp downstream of DSB<br>CCTAATCTGATCACGGTCGGTCCATTGCATA (followed by a 6 bp deletion) |                                             |
| 66<br>CTCGAACTGCTACTGGGT.....-28                                                                            | -7 -20.....TCGGTCCATTGCATAGAGGAG            |
| 6<br>CTCGAACTGCTACTGGGTTACCTCAG.....-19                                                                     | -37.....AGGAG                               |
| 54<br>CTCGAACTGCTACTGGGTTTC.....-26                                                                         | -31.....GCATAGAGGAG                         |
| 7 bp: CGGTCCA                                                                                               |                                             |
| 68<br>CTCGAACTGCTACTGGGTTACCTC.....-21                                                                      | -39.....-2GAG                               |
| 16<br>CTCGAACTGCTACTGGGTT.....-27                                                                           | -31.....GCATAGAGGAG                         |
| 23<br>CTCGAACTGCTACTGGGTTACCTCA.....-20                                                                     | +9 -38.....-1GGAG                           |
| TCAGCCTCT                                                                                                   |                                             |
| 60<br>CTCGAACTGCTAC.....-33                                                                                 | -29.....ATTGCATAGAGGAG                      |
| 33<br>CTCGAACTGCTACTGGGTTACCTCAGCCTCTGG.....-12+18                                                          | -49.....-12..                               |
| GTTCCACCTCAGCCTCTGG                                                                                         |                                             |
| 26<br>C...-4.....-45                                                                                        | -20.....GTCGGTCCATTGCATAGAGGAG              |
| 49<br>CTC-2.....-43                                                                                         | -27.....CATTGCATAGAGGAG                     |
| 36<br>CTCGAACTGCTACTGG.....-30                                                                              | -40.....-3.AG                               |
| 28<br>CTCGAACTGCTA.....-34                                                                                  | -41.....-4..G                               |
| 44<br>CTCGAA.....-40                                                                                        | -37.....AGGAG                               |
| 72<br>CTCGAACTGCTACTGGGT.....-28                                                                            | -63.....-26..                               |
| 8<br>CTCGAACTGCTACTGGGTTACCTCAGC.....-18                                                                    | +8 -77.....-40..                            |
| TGCTACTG                                                                                                    |                                             |
| 74<br>CTCGAACTGCTAC.....-33                                                                                 | -70.....-33..                               |
| 47<br>CTCGAACTGCTA.....-34                                                                                  | -70.....-33..                               |
| 48<br>CTCGAACTG.....-37                                                                                     | A -76.....-39..                             |

30  
 ..-15.....-56 **AC** -58.....-21..  
 13  
**CATGC-15**.....-56 -59.....-22..  
 53  
**CTCGAACTGCTACTGGG**.....-29 -100.....-63..  
 39  
**GTGA-26**.....-67 -68.....-31..  
 62  
**TTG-12**.....-53 -90.....-53..  
 70  
**CTCGAACTGCTACTGGGT**.....-28 -118.....-81..  
 52  
**G.-16**.....-57 -91.....-54..  
 46  
**CTCGAACTGCTACTGGGTTACCTCAGCCTCTGGAATAG**.....-7 **T** -155.....-118..  
 18  
**TCA-56**.....-97 -69.....-32..  
 11  
**CTCGAACTGCTACTGGG**.....-29 -147.....-117..  
 55  
**CA.-19**.....-60 -122.....-85..  
 2  
**CTCGAACTGCTACTGGGTTACCTCAGCCTCTGGAATAG**.....-7 -184.....-147..  
 41  
**GCT-10**.....-51 -146.....-109..  
 10  
**A.-75**.....-116 -130.....-93..  
 15  
**G.-12**.....-53 -212.....-175..  
 19  
**CTCGAACTGCTACTGGGTTACCTCAGCCTCTGGAATAGCTAGAAC** -292.....-255..  
 5  
**CTCGAACTGCTA**.....-34 -264.....-227..  
 20  
**.-277**.....-318 -31.....**GCATAGAGGAG**  
 42  
**CTCA-120**.....-161 -203.....-166..  
 5  
**GCT-113**.....-154 -216.....-179..  
 50  
**CTCGAACTGC**.....-36+165-42.....-5...  
 165bp from Homo sapiens chr17, clone RP11-670E13, complete sequence  
**TGCAGCAGGCCGAAAGGCCCTGTCCAAGGCCAAAACATCTTACCATTGTATTGTGCTGCAGACAGGAAGGGGTGTATGCCTGTAGAAGTGCTGA**  
**GGATATGTAAAGGAAGCCAGGgCCTGCGGTGTGACACGGGGCAAGTCAACTCACATTAGAAATGAACCA**  
 29  
 ..-31.....-72+205-36.....**GAGGAG**  
 205bp from Homo sapiens chr3, alternate assembly HuRef  
**CA**CAACTGGCACCATAGCCATGCCAGGTTGACAGGTGCAATTAACCATCACATTTGTCATCCAGAGAGAGTTTTTGCTATGTGATAAAAAGACATGC  
**TC**TTTCTTTCAGTTTTTTGTCTGTCTCCATGCAGACACAATTGACTTATTTAGAACTTATATGTATACTGTTTTTCCATTTAAACACAAAGGTTA  
**TC**TCATCCAATTT  
 27  
 ..-51.....-92+115-174.....-137..  
 +115bp from pCASD10A vector  
**CGGTCGCCGATACACTATTCTCAGAATGACTTGGTTGAGTACTCACCAGTCACAGAAAAGCATCTTACGGATGGCATGACAGTAAGAGAATTATGC**  
**AGTGCTGCCATAACCATG**

**HCT116 L4-/-**

---

**CTCGAACTGCTACTGGGTTACCTCAGCCTCTGGAATAGCTAGAAC** **GTAACCTAATCTGATCAGGTCGGTCCATTGCATAGAGGAG**

---

27, 42  
**CTCGAACTGCTACTG**.....-31 -13.....**ATCAGGTCGGTCCATTGCATAGAGGAG**  
 30  
**CTCGAACTG**.....-37 -49.....-12..  
 32  
**CTCGAACT**.....-38 -375.....-338..  
 22  
**CTCGAACTGCTACTGGGTTAC**.....-24 **ACA** -71.....-34..

23  
CT.-3.....-44      -71.....-34..  
36  
CATAGC-15.....-56      -59.....-22..  
25  
C.-4.....-45 **ACA** -494.....-457.  
28  
G.-176.....-217      -44.....-7...  
40  
G.-35.....-76      -500.....-463.  
21  
CT-10.....-51      -48.....-11..  
41  
ATC-20.....-61      -116.....-79..  
39  
CT-39.....-80      -272.....-235.  
14  
CTGA-22.....-63      -50.....-23..  
24  
C....-32.....-73      -324.....-287.  
5  
G.-31.....-74      -400.....-363.  
4  
ATTTT-68.....-109      -137.....-100.  
19  
GCCCTGGCC-125.....-166      -81.....-44..  
6  
TGCC-86.....-127      -75.....-38..  
10  
.-166.....-207      -174.....-137. 2  
T-212.....-253      -375.....-338.  
9  
.-146.....-187+106 **-53**.....-16..  
106bp inverted insertion from chr5 117bp downstream of DSB  
TCTCACTTGGGGAGGCCAAGGCGGACCACTTGAGGCCAAGAGTCCAATCTGGGCAACATACTGAGACCCCATCTGCACATATACAAAAAATTAG  
CCAGCGTGTT  
12  
**CTCGAAC**.....-35+81 **-335**.....-298..  
81bp : 70bp from chr5 directly downstream of DSB  
AGCCTCTGGAATAGCTAGAACTACAGGCACACTCCACGCTGGCTAATTTTTTTGTATATGTGCAGATG-**ACACCAATTT**  
37  
.-8.....-49+389 **-413**.....-376..  
389bp: NPM inverted sequence 310 bp downstream of DSB  
GGACAAATTCCTTTTTTTGTTAAGATTCGGGAAGTATATCAAGTTTCTAAAATCATACTTACTTTCATCATCATCCTCTTTCATCATCATCGTCATC  
ATCTTCATCAGCAGCAAGATTTACTTTTTCTTTAAAAGAAAAGATACGTACTCATGAATAAGAGCTGTTCTATCACCAAATAAAAAGCTATAATA  
CAAACCTATAATAAAATGCCATCTCTACCTGTGGAACCTTGCTACCACCTCCAGGGGCAGACCGCTTCCAGATACTTAAAGAGTTTCACATCC  
TCCTCCTTTCATCTTCTGACTCTGCATCTTCTCCACAGCTAAATACAATTTATTAGACATTATAAACTCAAGCAGCAAGAAGTCAGAAAAAAC  
T  
29  
**CTCGAACTGCTACTGGGTT**.....-27+512 **-29**.....**TGCATAGAGGAG**  
512bp : 506bp from NPM 1077bp downstream of DSB  
TCTTATGGTTTTATGTAGATATTTATTGACAAAAATAAGATTTCTAAAAGGGATATTAAGATTTCTTGGGATTTAAAATATGGTTGGAACAATATT  
TGATGACTTTATATTAAGTAGATCAAACATATGTTACAAACAGTTAATACGCACACTGGTATAAAGTACTGTTTATAATTGGTCTTATGTGTGCCA  
GTACCAGTAATGCATTGAATATGATTTGGCTCTCAGCTTTGTCTTCAGTTCAGGTTGGTCCATATGCATTTATTGAAAACAAATATAAGAACAT  
GCATTTAAAAGAGAACCTGCATGAAAGATCAAATGGGAGTTAGGTTTTAAGCTGGTGGTCTTCAAAATCTTTGAGCATGACGATGAAGGCAGA  
AAACAGGAAAAAGGCCGAAAGAGCCGAAAGCTTAAAATTCAAAGTATGACCAGGCGCAGTGGTTCACACCCGTAATCCTAACACCCAGCCAAGATG  
AGTCTATGCAATGCAATGAG**TCTATG**

**Figure S6, related to Figure 6. LIG3 deficiency is not required for translocation formation in human cells.**

- A. LIG3 null cells: Western blot, PCR genotyping, ZFN expression, and indel formation.  $L3^{-/-}$  HCT116 cells are viable due to MtLIG1 expression, as seen in mouse cells (Simsek et al., 2011a).  
In the westerns, the same blot was used to probe for both epitopes.

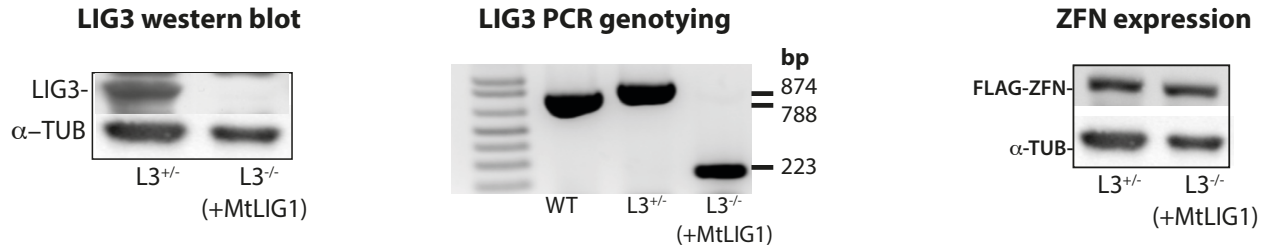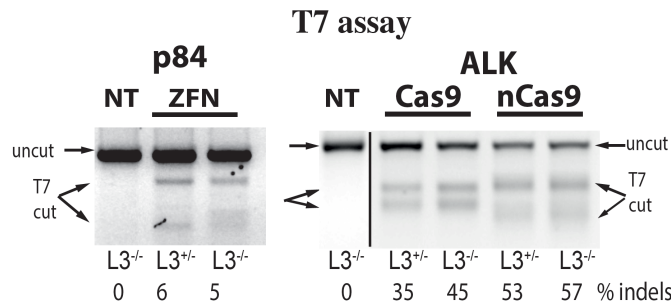

Indel formation is not affected by LIG3 loss, as monitored by the T7-endonuclease assay in  $L3^{+/-}$  and  $L3^{-/-}$  cells expressing MtLIG1 (abbreviated  $L3^{-/-}$ ). Two loci were examined, p84/AAVS1 using ZFN<sup>p84</sup> and ALK using either wild-type Cas9 with gRNA ALK1 or nCas9 with gRNAs ALK1+ALK2. NT, not transfected (i.e., no nuclease).

- B. Translocation junction sequences from ZFNs. The ZFN recognition sequences at each DNA end are underlined; bps in italics represent the overhangs. The chromosome 19 end is in black and the chromosome 22 end is in red. Microhomologies (underlined), insertions (green) and lengths of deletions from each end are indicated.

**Der22**

**HCT116 Lig3+/-**

|                                                                                                                                                                                                                                                                                                                                                               |                                                                                                                                                                                                                                                  |
|---------------------------------------------------------------------------------------------------------------------------------------------------------------------------------------------------------------------------------------------------------------------------------------------------------------------------------------------------------------|--------------------------------------------------------------------------------------------------------------------------------------------------------------------------------------------------------------------------------------------------|
| <p><b>ATCGTTTTGGCCTCCCTATCAGTCATT</b></p> <p>6, 47, 52, 69, 75</p> <p><b>ATCGTTTTGGCCTCCCTATCAGTCATT</b></p> <p>2, 29, 36, 45, 54, 68, 73</p> <p><b>ATCGTTTTGGCCTCCCTATCAGTCAT.</b></p> <p>62</p> <p><b>ATCGTTTTGGCCTCCCTATCAGTCA..</b></p> <p>20</p> <p><b>ATCGTTTTGGCCTCCCTATCAGTCAT.</b></p> <p>64</p> <p><b>ATCGTTTTGGCCTCCCTATCAGTCA..</b></p> <p>11</p> | <p><b>GTGGCCCACTGTGGGGTGGAGGGGACAGAT</b></p> <hr/> <p>..GGCCCACTGTGGGGTGGAGGGGACAGAT</p> <p>..GGCCCACTGTGGGGTGGAGGGGACAGAT</p> <p>..GGCCCACTGTGGGGTGGAGGGGACAGAT</p> <p>..1GCCCACTGTGGGGTGGAGGGGACAGAT</p> <p>..1GCCCACTGTGGGGTGGAGGGGACAGAT</p> |
|---------------------------------------------------------------------------------------------------------------------------------------------------------------------------------------------------------------------------------------------------------------------------------------------------------------------------------------------------------------|--------------------------------------------------------------------------------------------------------------------------------------------------------------------------------------------------------------------------------------------------|

```

ATCGTTTTGGCCTCCCTATCAGTC-1. .TGGCCCCACTGTGGGGTGGAGGGGACAGAT
58
ATCGTTTTGGCCTCCCTATCAGTCATT CAT ..-4..CCACTGTGGGGTGGAGGGGACAGAT
51
ATCGTTTTGGCCTCCCTATCAGTCAT. ..-5...CACTGTGGGGTGGAGGGGACAGAT
12
ATCGTTTTGGCCTCCCTATC...-5.. .TGGCCCCACTGTGGGGTGGAGGGGACAGAT
39
ATCGTTTTGGCCTCCCT.....-8.. .TGGCCCCACTGTGGGGTGGAGGGGACAGAT
33
ATCGTTTTGGC.....-14.. .TGGCCCCACTGTGGGGTGGAGGGGACAGAT
15
ATCGTTTTGGC.....-13.. ..-3.CCCACTGTGGGGTGGAGGGGACAGAT
24
ATCGTTTTGGC.....-13.. ..-6....ACTGTGGGGTGGAGGGGACAGAT
8
ATCGTTTTGGCCTCCCTA.....-7.. ..-11.....GGGGTGGAGGGGACAGAT
76
ATCGTTTTG.....-16.. +17 ..-2CCCCACTGTGGGGTGGAGGGGACAGAT
17 bp : ACCCCGGCATCCCCAC
4
ATCGTTTT.....-18.. ..-16.....GGAGGGGACAGAT
44
A.....-28.. ..-24.....
21
A.....-28.. ..-33.....
28
A.....-34.. ..-40.....
27
.....-43.. T ..-41.....
66
GTA.....-45.. ..-36.....
22
CA.....-41.. ..-52.....
61
.....-64.. AG ..-60.....
77
A.....-100.. ..-110.....
35
.....-108.. ..-115.....
3
TA.....-205.. ..-36.....
37
GAG.....-36.. ..-158.....
32
.....-37.. +78 .TGGCCCCACTGTGGGGTGGAGGGGACAGAT
78bp from ZFN plasmid
AGGTGATGGAGTTCATGAAGGTGTACGGCTACAGGGGAAAGCACCTGGGCGGAAGCAGAAAGCCTGACGGCGCCA
19
ATCGTTTTGGCCTCCCTATCAG.-3.. +94 ..-8.....TGTGGGGTGGAGGGGACAGAT
94bp from Homo sapiens chromosome 10, alternate assembly HuRef
GGACAATGCCCTATGAGAAGATGGGAGAGAAATCAGAAAGAGGGCCCTGGAAGACTGTAAGGGCCGGGACAGCCTGCAA
CCTGGACATTATT

```

**HCT116 Lig3-/-**

---

```

ATCGTTTTGGCCTCCCTATCAGTCATT GTGGCCCCACTGTGGGGTGGAGGGGACAGAT
3, 8, 37, 39, 43
ATCGTTTTGGCCTCCCTATCAGTCAT. .._GGCCCCACTGTGGGGTGGAGGGGACAGAT
9, 31
ATCGTTTTGGCCTCCCTATCAGT-2.. ..GGCCCCACTGTGGGGTGGAGGGGACAGAT

```

```

48 ATCGTTTTGGCCTCCCTATCAGTCA.. -1GCCCCACTGTGGGGTGGAGGGGACAGAT
5 ATCGTTTTGGCCTCCCTATCAGT-2.. G GTGGCCCACTGTGGGGTGGAGGGGACAGAT
23 ATCGTTTTGGCCTCCCTATCAGTC-1.. TC ..-2CCCACTGTGGGGTGGAGGGGACAGAT
4 ATCGTTTTGGCCTCCCTATCA..-4.. .TGGCCCACTGTGGGGTGGAGGGGACAGAT
45 ATCGTTTTGGCCTCCCTATCAG-3.. -1GCCCCACTGTGGGGTGGAGGGGACAGAT
14 ATCGTTTTGGCCTCCCTATC...-5.. .TGGCCCACTGTGGGGTGGAGGGGACAGAT
10 ATCGTTTTGGCCTCCCTATCAG-3.. ..-3.CCCACTGTGGGGTGGAGGGGACAGAT
30 ATCGTTTTGGCCTCCCTAT...-6.. ..GGCCCACTGTGGGGTGGAGGGGACAGAT
20 ATCGTTTTGGCCTCCCTATCAGTCAT. ..-5...CACTGTGGGGTGGAGGGGACAGAT
44 ATCGTTTTGGCCTCCCTATCAGTCAT. ..-9.....GTGGGGTGGAGGGGACAGAT
11 ATCGTTTTGGCCTCCCTA.....-7.. ..-2CCCACTGTGGGGTGGAGGGGACAGAT
18 ATCGTTTTGGCCTCCCT.....-8.. .TGGCCCACTGTGGGGTGGAGGGGACAGAT
17 ATCGTTTTGGCCTCCCTATCAGTCATT ..-9.....GTGGGGTGGAGGGGACAGAT
12 ATCGTTTTGGCC.....-13.. ..-4..CCACTGTGGGGTGGAGGGGACAGAT
15 .....-28.. ..-23.....ACAGAT
36 ATC.....-23.. ..-37.....
1 TGGG.....-54.. ..-69.....
6 .....-98.. ..-19.....GGGACAGAT
38 .....-52.. .TGGCCCACTGTGGGGTGGAGGGGACAGAT
42 .....-68.. .TGGCCCACTGTGGGGTGGAGGGGACAGAT
19 .....-164.. ..-29.....
29 .....-96.. ..-83.....
7 C.....-172.. ..-176.....
26 CAT.....-199.. ..-141.....
16 .....-30.. +171 ..-35.....
171bp insertion from chr22 45bp downstream of DSB
TTGATAGTCAAGTAAAAGCTATGTTTTTTTGTGCTGTTTGTATATCCATTAAGGGGAAAAATGGCCAGGCATGGTGGCT
CACACCTGTAATCCAGCACTTTGGGGGAGGCCAAGGCAGGAGGATCACTTGAGACCAGGAGTTTGAGACCACCTGGGC
AACATAGTGAGACCC

```

C. Junction sequences from Cas9. The PAM sequence is underlined; bp in italics represents a possible overhang.

**Der5**

**HCT116 Lig3+/-**

---

**DNA ends:**

|                                            |   |                                        |
|--------------------------------------------|---|----------------------------------------|
| <b>GCAGTGATGTGATCATAGCTTGCTATATCCTCGAA</b> |   | <b>GTAACCCTAATCTGATCACGGTCGGTCCATT</b> |
| <hr/>                                      |   |                                        |
| 1, 9, 12, 14, 19, 31, 32, 35, 47           |   |                                        |
| GCAGTGATGTGATCATAGCTTGCTATATCCTCGAA        |   | GTAACCCTAATCTGATCACGGTCGGTCCATT        |
| 7, 17, 28, 38, 40                          |   |                                        |
| GCAGTGATGTGATCATAGCTTGCTATATCCTCGA.        |   | GTAACCCTAATCTGATCACGGTCGGTCCATT        |
| 10                                         |   |                                        |
| GCAGTGATGTGATCATAGCTTGCTATATCCTCGAA        | C | -1TAACCCTAATCTGATCACGGTCGGTCCATT       |
| 36                                         |   |                                        |
| GCAGTGATGTGATCATAGCTTGCTATATCCTCGAA        |   | -8.....AATCTGATCACGGTCGGTCCATT         |
| 45                                         |   |                                        |
| GCAGTGATGTGATCATAGCTTGCTATATCCTCGAA        |   | -19.....GGTCGGTCCATT                   |
| 5                                          |   |                                        |
| GCAGTGATGTGATCATAGCTTGCTATATCCT.-3.        |   | GTAACCCTAATCTGATCACGGTCGGTCCATT        |
| 42                                         |   |                                        |
| .....-48.                                  |   | GTAACCCTAATCTGATCACGGTCGGTCCATT        |
| 13                                         |   |                                        |
| .....-52.                                  |   | GTAACCCTAATCTGATCACGGTCGGTCCATT        |
| 26                                         |   |                                        |
| C.....-32.                                 |   | -47.....                               |
| 39                                         |   |                                        |
| TGTG.....-88.                              |   | -87.....                               |
| 6                                          |   |                                        |
| C.....-94.                                 |   | -59.....                               |
| 43                                         |   |                                        |
| AAA.....-76.                               |   | -354.....                              |
| 41                                         |   |                                        |
| GCAGTGATGTGATCATAGCTTGCTATATCCT.-3.        |   | -329.....                              |
| 18                                         |   |                                        |
| .....-279.                                 |   | -13.....GATCACGGTCGGTCCATT             |

**HCT116 Lig3-/-**

---

**DNA ends:**

|                                            |    |                                        |
|--------------------------------------------|----|----------------------------------------|
| <b>GCAGTGATGTGATCATAGCTTGCTATATCCTCGAA</b> |    | <b>GTAACCCTAATCTGATCACGGTCGGTCCATT</b> |
| <hr/>                                      |    |                                        |
| 12, 15, 20, 22, 24, 32, 37, 39             |    |                                        |
| GCAGTGATGTGATCATAGCTTGCTATATCCTCGAA        |    | GTAACCCTAATCTGATCACGGTCGGTCCATT        |
| 18                                         |    |                                        |
| GCAGTGATGTGATCATAGCTTGCTATATCCTCGAA        | C  | GTAACCCTAATCTGATCACGGTCGGTCCATT        |
| 16, 28                                     |    |                                        |
| GCAGTGATGTGATCATAGCTTGCTATATCCTCGAA        | CT | GTAACCCTAATCTGATCACGGTCGGTCCATT        |
| 11                                         |    |                                        |
| GCAGTGATGTGATCATAGCTTGCTATATCCTCGAA        |    | -1TAACCCTAATCTGATCACGGTCGGTCCATT       |
| 26                                         |    |                                        |
| GCAGTGATGTGATCATAGCTTGCTATATCCTCGAA        |    | -3..ACCCTAATCTGATCACGGTCGGTCCATT       |
| 38                                         |    |                                        |
| GCAGTGATGTGATCATAGCTTGCTATATCCTCG-1        |    | -1TAACCCTAATCTGATCACGGTCGGTCCATT       |
| 29                                         |    |                                        |
| GCAGTGATG.....-25.                         |    | -20.....GTCGGTCCATT                    |
| 23                                         |    |                                        |
| GCAGTGATGTGATCATAGCTTGCTATATCCTCGAA        |    | -138.....                              |
| 15                                         |    |                                        |
| .....-106.                                 |    | -21.....TCGGTCCATT                     |
| 35                                         |    |                                        |
| .....-63.                                  |    | -42.....                               |
| 25                                         |    |                                        |
| .....-107.                                 |    | -74.....                               |
| 36                                         |    |                                        |
| .....-234.                                 |    | GTAACCCTAATCTGATCACGGTCGGTCCATT        |
| 21                                         |    |                                        |
| A.....-56.                                 |    | -113.....                              |
| 34                                         |    |                                        |



CAG.....-55. -337.....  
 31  
 GCAG.....-32. -419.....

D. Junction sequences from nCas9. The bps in italics represent overhangs.

**Der5**

**HCT116 Lig3+/-**

| DNA ends:                                            |                                                |
|------------------------------------------------------|------------------------------------------------|
| CTCGAACTGCTACTGGGTTACCTCAGCCTCTGGAATAGCTAGAAC        | GTAACCCCTAATCTGATCACGGTCGGTCCATTGCATAGAGGAG    |
| 30                                                   |                                                |
| CTCGAACTGCTACTGGGTTACCTCAGCCTCTGGAATAGCTAGAAC        | -28.....ATTGCATAGAGGAG                         |
| 7                                                    |                                                |
| CTCGAACTGCTACTGGGTTACCTCAGCCTCTGGAATAGCTAGAAC        | GT -33.....ATAGAGGAG                           |
| 34                                                   |                                                |
| CTCGAACTGCTACT.....-32                               | -1TAACCCCTAATCTGATCACGGTCGGTCCATTGCATAGAGGAG   |
| 2                                                    |                                                |
| CTCGAACTGCTACTGGGTTACCTCAGCCTCTGGAATAGC....-6        | -41.....-4..G                                  |
| 29                                                   |                                                |
| CTCGAACTGCTACTGGGTTACCTCAGCCTCTGGA.....-11           | -36.....GAGGAG                                 |
| 1                                                    |                                                |
| CTCGAACTGCTACTGGGTTACC.....-23                       | G -26.....CCATTGCATAGAGGAG                     |
| 19                                                   |                                                |
| CTCGAACTGCTACTGGGTTACCTCAGC.....-18                  | -33.....ATAGAGGAG                              |
| 33                                                   |                                                |
| CTCGAACTGCTACTGGG.....-29                            | -22.....CGGTCCATTGCATAGAGGAG                   |
| 13                                                   |                                                |
| CTCGAACTGCT.....-35                                  | CG -33.....ATAGAGGAG                           |
| 37                                                   |                                                |
| CTCG-1.....-41                                       | -27.....CATTGCATAGAGGAG                        |
| 22.                                                  |                                                |
| CTCGAAC.....-39                                      | -32.....CATAGAGGAG                             |
| 35                                                   |                                                |
| CTCGA.....-41                                        | -34.....TAGAGGAG                               |
| 18                                                   |                                                |
| CTCGAACTGCTACTG.....-31                              | -45.....-8..                                   |
| 36                                                   |                                                |
| CTCGAACTGCTACTG.....-31                              | -49.....-12..                                  |
| 5                                                    |                                                |
| CTCGAACTGCTACTGGGTTACCTCAGCCT.....-16                | -77.....-40..                                  |
| 27                                                   |                                                |
| ..-18.....-59                                        | -37.....AGGAG                                  |
| 32                                                   |                                                |
| A..-9.....-50                                        | -50.....-13..                                  |
| 31                                                   |                                                |
| CATAGC-15.....-56                                    | -59.....-22..                                  |
| 38                                                   |                                                |
| CAT-18.....-59                                       | -84.....-47..                                  |
| 6                                                    |                                                |
| ..-113.....-154+26                                   | -19.....GGTCGGTCCATTGCATAGAGGAG                |
| 26bp : CGGCAC <del>TT</del> TACAACCTAAATGCCATCAGT    |                                                |
| 3                                                    |                                                |
| CTCGAACTGCTACTGGGTTACCTCAGCCTCTGG.....-12            | GTT -168.....-131.                             |
| 24                                                   |                                                |
| ..-50.....-91                                        | -98.....-61..                                  |
| 26                                                   |                                                |
| GA-36.....-77                                        | -113.....-76..                                 |
| 23                                                   |                                                |
| ..-129.....-170                                      | C -35.....ACAGGAG                              |
| 11                                                   |                                                |
| CTCGAACTGCTACTGGG.....-29                            | -185.....-148.                                 |
| 10                                                   |                                                |
| A-112.....-153                                       | -150.....-113.                                 |
| 8                                                    |                                                |
| ..-207.....-248                                      | -64.....-27..                                  |
| 21                                                   |                                                |
| CTCGAACTGCTAC ( TGGGTTACCTCAGCCTCTGGAATAGCTAGA-2+304 | GTAACCCCTAATCTGATCACGGTCGGTCCATTGCATA ) GAGGAG |

+304 bp:

repeats of 36bp from ALK directly downstream of DSB + repeats of 31bp of NPM 2bp upstream of DSB:  
(GTAACCCTAATCTGATCACGGTCGGTCCATTGCATA) (TGGGTTACCTCAGCCTCTGGAATAGCTAGAGTAACCCTAATCTGATCACGGTCGGTC  
CATTGCATA) (TGGGTTACCTCAGCCTCTGGAATAGCTAGAGTAACCCTAATCTGATCACGGTCGGTCCATTGCATA) (TGGGTTACCTCAGCCT  
CTGGAATAGCTAGAGTAACCCTAATCTGATCACGGTCGGTCCATTGCATA) (TGGGTTACCTCAGCCTCTGGAATAGCTAGAGTAACCCTAATCTGATCACGGTCGGTC

### HCT116 Lig3-/-

| CTCGAAGTCTACTGGGTTACCTCAGCCTCTGGAATAGCTAGAAC                                 | GTAACCCTAATCTGATCACGGTCGGTCCATTGCATAGAGGAG |
|------------------------------------------------------------------------------|--------------------------------------------|
| 35                                                                           |                                            |
| CTCGAAGTCTACTGGGTTACCTCAGCCTCTGGAATAGCTAGAAC                                 | -32.....CATAGAGGAG                         |
| 49                                                                           |                                            |
| CTCGAAGTCTACTGGGTTACCTCAGCCTCTGGAATAGCTAG. 3- T                              | -34.....TAGAGGAG                           |
| 26                                                                           |                                            |
| CTCGAAGTCTACTGGGTTACCTCAGCCTCTGGAATAG.....-7                                 | -37.....AGGAG                              |
| 8                                                                            |                                            |
| CTCGAAGTCTACTGGGTTACCTCAGCC.....-17                                          | -28.....ATTGCATAGAGGAG                     |
| 46                                                                           |                                            |
| C...-4.....-45+24-1TAACCCTAATCTGATCACGGTCGGTCCATTGCATAGAGGAG                 |                                            |
| 24bp repeat from chr2 directly downstream of DSB<br>CCTAATCTGATCACGGTCGGTCCA |                                            |
| 41                                                                           |                                            |
| CTCGAAGTCTACTGGGTTCA.....-25                                                 | -23.....GGTCCATTGCATAGAGGAG                |
| 4                                                                            |                                            |
| CTCGAAGTCTACTGGGTTACCTCAGCCTCTGGAATAG.....-7                                 | -44.....-7...                              |
| 22                                                                           |                                            |
| CTCGAAGTCTACTGGGTTCT.....-26                                                 | -27.....CATTGCATAGAGGAG                    |
| 39                                                                           |                                            |
| CTCGAAGTCTACTGGG.....-29                                                     | -24.....GTCCATTGCATAGAGGAG                 |
| 21                                                                           |                                            |
| CTCGAAGTCTACTGG.....-30                                                      | -25.....TCCATTGCATAGAGGAG                  |
| 32                                                                           |                                            |
| CTCGAAGTCTACTGGGTTACCTCAGCCTCT.....-14+24                                    | -43.....-8...                              |
| 30                                                                           |                                            |
| CTCGA.....-41 C                                                              | -21.....TCGGTCCATTGCATAGAGGAG              |
| 2                                                                            |                                            |
| CTCGAAGTCT.....-37                                                           | -33.....ATAGAGGAG                          |
| 37                                                                           |                                            |
| CTCGAAGTCTG.....-36                                                          | -33.....ATAGAGGAG                          |
| 48                                                                           |                                            |
| CTCGAAGTCTACTGG.....-30                                                      | -40.....-3. AG                             |
| 42                                                                           |                                            |
| CTCGAAGTCTG.....-36                                                          | -61.....-24..                              |
| 6                                                                            |                                            |
| CTCGAAGTCT.....-38 T                                                         | -69.....-32..                              |
| 9                                                                            |                                            |
| CTCGAAGTCTACTGGGTTACCTCAGCCTCTGG.....-12                                     | -99.....-62..                              |
| 45                                                                           |                                            |
| CTCGAAGTCTACTGGGTTACCTCAGCCTCTGG.....-12                                     | -99.....-62..                              |
| 43                                                                           |                                            |
| ..-81.....-122                                                               | GTAACCCTAATCTGATCACGGTCGGTCCATTGCATAGAGGAG |
| 24                                                                           |                                            |
| CAT-18.....-59                                                               | -84.....-47..                              |
| 31                                                                           |                                            |
| CA-19.....-60                                                                | -107.....-70..                             |
| 34                                                                           |                                            |
| CAC-92.....-133                                                              | -54.....-17..                              |
| 17                                                                           |                                            |
| C...-4.....-41                                                               | -159.....-122.                             |
| 40                                                                           |                                            |
| T-64.....-104                                                                | -147.....-110.                             |
| 13                                                                           |                                            |
| CTCGAAGTCTACT.....-32                                                        | -220.....-183.                             |
| 3                                                                            |                                            |
| CAC-103.....-144                                                             | -123.....-86..                             |
| 18                                                                           |                                            |
| GTGGC-82.....-123                                                            | -146.....-108.                             |
| 27                                                                           |                                            |
| TG.-90.....-131                                                              | -159.....-122.                             |



**Figure S7, related to Figure 7. Translocation junction sequences from ZFN<sup>EWS</sup> and ZFN<sup>p84</sup> expression after CtIP depletion.**

A. Indel formation at the ZFN<sup>p84</sup> site is minimally affected by CtIP knockdown, as monitored by the T7-endonuclease assay in either wild-type or XRCC4-deficient HCT116 cells. Western blot of CtIP knock-down is shown on the left. The same blot was used to probe for both CtIP and tubulin.

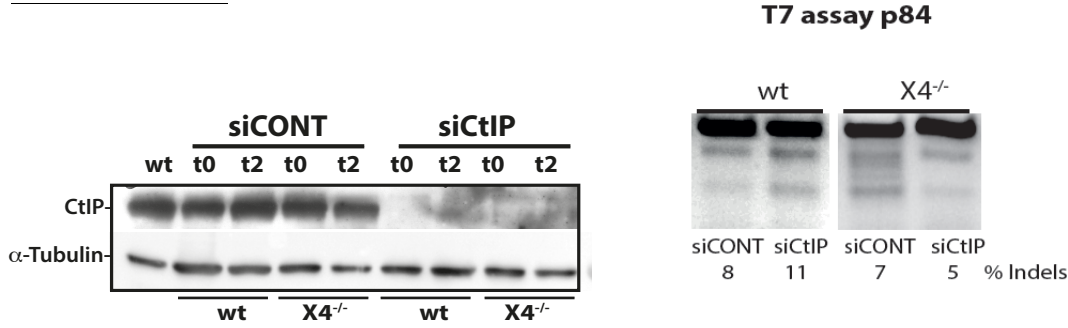

B. Translocation junction sequences from ZFNs in wild-type cells. The ZFN recognition sequences at each DNA end are underlined; bps in italics represent the overhangs. The chromosome 19 end is in black and the chromosome 22 end is in red. Microhomologies (underlined), insertions (green) and lengths of deletions from each end are indicated.

**Der22**

**HCT116 wt-SiCONT**

| DNA ends:                          |                                        |
|------------------------------------|----------------------------------------|
| <b>ATCGTTTTGGCCTCCCTATCAGTCATT</b> | <b>GTGGCCCCACTGTGGGGTGGAGGGGACAGAT</b> |
| 3, 5, 25, 27, 31, 40               |                                        |
| <b>ATCGTTTTGGCCTCCCTATCAGTCATT</b> | ..GGCCCCACTGTGGGGTGGAGGGGACAGAT        |
| 4, 9, 20, 39                       | ..GGCCCCACTGTGGGGTGGAGGGGACAGAT        |
| <b>ATCGTTTTGGCCTCCCTATCAGTCAT.</b> | ..GGCCCCACTGTGGGGTGGAGGGGACAGAT        |
| 35                                 | ..GGCCCCACTGTGGGGTGGAGGGGACAGAT        |
| <b>ATCGTTTTGGCCTCCCTATCAGTCAT.</b> | ..-3.CCCACTGTGGGGTGGAGGGGACAGAT        |
| 38                                 | ..-4..CCACTGTGGGGTGGAGGGGACAGAT        |
| <b>ATCGTTTTGGCCTCCCTATCAGTCAT.</b> | ..-1GCCCCCCACTGTGGGGTGGAGGGGACAGAT     |
| 24                                 | ..-5...CACTGTGGGGTGGAGGGGACAGAT        |
| <b>ATCGTTTTGGCCTCCCTATCAGTC-1.</b> | ..-11.....GGGGTGGAGGGGACAGAT           |
| 23                                 | ..-2CCCCACTGTGGGGTGGAGGGGACAGAT        |
| <b>ATCGTTTTGGCCTCCCTATCAG-3..</b>  | ..-12.....GGGTGGAGGGGACAGAT            |
| 22                                 | ..-52.....                             |
| <b>ATCGTTTTGGCCTCCCTATCAGTCAT.</b> | ..-36.....                             |
| 13                                 | ..-47.....                             |
| <b>ATCGTTTTGGCCTCCCTATCAGTCAT.</b> |                                        |
| 34                                 |                                        |
| <b>ATCGTTTTG.....-16..</b>         |                                        |
| 33                                 |                                        |
| <b>ATCGTTTTGGCCTCCCTATCAG-3..</b>  |                                        |
| 42                                 |                                        |
| <b>CA.....-41..</b>                |                                        |
| 12                                 |                                        |
| <b>GTA.....-45..</b>               |                                        |
| 29                                 |                                        |
| <b>CAG.....-45..</b>               |                                        |

**HCT116 wt-SiCtIP**

| <b><u>ATCGTTTTGGCCTCCCTATCAGTCATT</u></b> |             | <b><u>GTGGCCCCACTGTGGGGTGGAGGGGACAGAT</u></b> |
|-------------------------------------------|-------------|-----------------------------------------------|
| 65,71,85                                  |             | ..GGCCCCACTGTGGGGTGGAGGGGACAGAT               |
| <u>ATCGTTTTGGCCTCCCTATCAGTCATT</u>        |             | ..GGCCCCACTGTGGGGTGGAGGGGACAGAT               |
| 81,84,88                                  |             | ..GGCCCCACTGTGGGGTGGAGGGGACAGAT               |
| <u>ATCGTTTTGGCCTCCCTATCAGTCAT.</u>        |             | ..GGCCCCACTGTGGGGTGGAGGGGACAGAT               |
| 82                                        | <b>ATAC</b> | GTGGCCCCACTGTGGGGTGGAGGGGACAGAT               |
| <u>ATCGTTTTGGCCTCCCTATCAGTCAT.</u>        |             | ..GGCCCCACTGTGGGGTGGAGGGGACAGAT               |
| 63,66                                     |             | ..GGCCCCACTGTGGGGTGGAGGGGACAGAT               |
| <u>ATCGTTTTGGCCTCCCTATCAGTCAT.</u>        |             | ..GGCCCCACTGTGGGGTGGAGGGGACAGAT               |
| 72                                        | <b>CTC</b>  | ..GGCCCCACTGTGGGGTGGAGGGGACAGAT               |
| <u>ATCGTTTTGGCCTCCCTATCAGTC-1.</u>        |             | ..GGCCCCACTGTGGGGTGGAGGGGACAGAT               |
| 54                                        | <b>C</b>    | ..GGCCCCACTGTGGGGTGGAGGGGACAGAT               |
| <u>ATCGTTTTGGCCTCCCTATCAGTCAT.</u>        |             | ..GGCCCCACTGTGGGGTGGAGGGGACAGAT               |
| 59                                        |             | ..GGCCCCACTGTGGGGTGGAGGGGACAGAT               |
| <u>ATCGTTTTGGCCTCCCTATCAGTC-1.</u>        |             | ..GGCCCCACTGTGGGGTGGAGGGGACAGAT               |
| 56                                        |             | ..GGCCCCACTGTGGGGTGGAGGGGACAGAT               |
| <u>ATCGTTTTGGCCTCCCTATCAGT-2..</u>        |             | ..GGCCCCACTGTGGGGTGGAGGGGACAGAT               |
| 78                                        |             | ..GGCCCCACTGTGGGGTGGAGGGGACAGAT               |
| <u>ATCGTTTTGGCCTCCCTATCA..-4..</u>        |             | ..GGCCCCACTGTGGGGTGGAGGGGACAGAT               |
| 55                                        |             | ..GGCCCCACTGTGGGGTGGAGGGGACAGAT               |
| <u>ATCGTTTTGGCCTCCCTATCA..-4..</u>        |             | ..GGCCCCACTGTGGGGTGGAGGGGACAGAT               |
| 52                                        |             | ..GGCCCCACTGTGGGGTGGAGGGGACAGAT               |
| <u>ATCGTTTTGGCCTCCCT..-8..</u>            |             | ..GGCCCCACTGTGGGGTGGAGGGGACAGAT               |
| 51                                        |             | ..GGCCCCACTGTGGGGTGGAGGGGACAGAT               |
| <u>ATCGTTTTGGCCTCCCTATCAGTCAT.</u>        |             | ..GGCCCCACTGTGGGGTGGAGGGGACAGAT               |
| 80                                        |             | ..GGCCCCACTGTGGGGTGGAGGGGACAGAT               |
| <u>.....-32..</u>                         |             | ..GGCCCCACTGTGGGGTGGAGGGGACAGAT               |
| 95                                        |             | ..GGCCCCACTGTGGGGTGGAGGGGACAGAT               |
| <u>ATCGTTTTGGCCTCCCTATCAGTCAT.</u>        |             | ..GGCCCCACTGTGGGGTGGAGGGGACAGAT               |

C. Translocation junction sequences from ZFNs in X4<sup>-/-</sup> cells.

**HCT116 X4<sup>-/-</sup>-siCTRL**

| <b><u>ATCGTTTTGGCCTCCCTATCAGTCATT</u></b> |               | <b><u>GTGGCCCCACTGTGGGGTGGAGGGGACAGAT</u></b> |
|-------------------------------------------|---------------|-----------------------------------------------|
| 15                                        |               | ..-4..CCACTGTGGGGTGGAGGGGACAGAT               |
| <u>ATCGTTTTGGCC.....-13..</u>             |               | ..-4..CCACTGTGGGGTGGAGGGGACAGAT               |
| 33                                        |               | ..-4..CCACTGTGGGGTGGAGGGGACAGAT               |
| <u>.....-31..</u>                         |               | ..-4..CCACTGTGGGGTGGAGGGGACAGAT               |
| 15                                        | <b>A</b>      | ..-25.....AGAT                                |
| <u>ATCGTTTTGGCC.....-13..</u>             |               | ..-25.....AGAT                                |
| 4                                         | <b>CTAGAG</b> | ..-4..CCACTGTGGGGTGGAGGGGACAGAT               |
| <u>.....-33..</u>                         |               | ..-4..CCACTGTGGGGTGGAGGGGACAGAT               |
| 6                                         | <b>GTCAC</b>  | ..-24.....CAGAT                               |
| <u>ATCGTT.....-20..</u>                   |               | ..-24.....CAGAT                               |
| 17                                        |               | ..-27.....                                    |
| <u>AT.....-24..</u>                       |               | ..-27.....                                    |
| 22                                        | <b>GAA</b>    | ..-50.....                                    |
| <u>A.....-25..</u>                        |               | ..-50.....                                    |
| 47                                        |               | ..-42.....                                    |
| <u>GA.....-36..</u>                       |               | ..-42.....                                    |
| 39                                        | <b>TC</b>     | ..-41.....                                    |
| <u>AT.....-24..</u>                       |               | ..-41.....                                    |

|    |                                |              |                                         |
|----|--------------------------------|--------------|-----------------------------------------|
| 37 | <u>AGTA</u> .....-34..         |              | ..-36.....                              |
| 19 | .....-38..                     |              | ..-24.....                              |
| 46 | .....-36..                     | <b>G</b>     | ..-31.....                              |
| 12 | <u>AC</u> .....-26..           |              | ..-37.....                              |
| 13 | <u>AG</u> .....-36..           |              | ..-41.....                              |
| 42 | .....-44..                     |              | ..-54.....                              |
| 11 | <u>CAG</u> .....-40..          | <b>G</b>     | ..-41.....                              |
| 35 | <u>G</u> .....-53..            |              | ..-49.....                              |
| 8  | .....-50..                     |              | ..-51.....                              |
| 7  | <u>TGG</u> .....-55..          |              | ..-81.....                              |
| 2  | <u>GAG</u> .....-36..          |              | ..-49.....                              |
| 10 | <u>CAGA</u> .....-68..         |              | ..-48.....                              |
| 3  | <u>AGCC</u> .....-68..         |              | ..-51.....                              |
| 38 | .....-218..                    |              | ..-4.. <b>CCACTGTGGGGTGGAGGGGACAGAT</b> |
| 20 | <u>AA</u> .....-86..           |              | ..-164.....                             |
| 32 | <u>GGGGA</u> .....-52..        |              | ..-253.....                             |
| 27 | .....-362..                    | <b>T</b>     | ..-18..... <b>AGGGGACAGAT</b>           |
| 40 | .....-315..                    |              | ..-32.....                              |
| 5  | <u>AAGA</u> .....-162..        |              | ..-319.....                             |
| 16 | .....-264..                    | <b>ATCTG</b> | ..-26.....                              |
| 26 | <u>TTGT</u> .....-46..         |              | ..-375.....                             |
| 29 | <u>CC</u> .....-126..          |              | ..-185.....                             |
| 21 | <b>ATCGTTTTGGCC</b> .....-13.. |              | ..-432.....                             |
| 18 | <u>AAG</u> .....-109..         |              | ..-408.....                             |
| 41 | .....-331..                    |              | ..-194.....                             |
| 45 | <u>CAA</u> .....-27..          |              | ..-426.....                             |
| 31 | .....-28..                     | <b>+108</b>  | ..-393.....                             |

108 bp inverted insertion from 1321 bp upstream the DSB on chr19  
GCATCGCCCCCTGCTGTGGCTGTCCCAAGTTCCTTAGGGTACCCACGTGGGTTTATCAACCACTTGGTGAGGCTGGTACCCTGC  
CCCCATTCCTGCACTGCCATGG

**HCT116 X4-/-siCtIP**

**ATCGTTTTGGCCTCCCTATCAGTCATT**

**GTGGCCCCACTGTGGGGTGGAGGGGACAGAT**

|                            |                                     |                |                                          |
|----------------------------|-------------------------------------|----------------|------------------------------------------|
| 43                         |                                     |                | ..-7..... <b>CTGTGGGGT</b> GGAGGGGACAGAT |
|                            | <b>ATCGTTTTGGCCTCCCTATCA</b> ..-4.. |                |                                          |
| 46                         |                                     |                | ..-6.... <b>ACTGTGGGGT</b> GGAGGGGACAGAT |
|                            | <b>ATCGTTTTGGCCTCCC</b> .....-9..   |                |                                          |
| 38                         |                                     |                | ..-4.. <b>CCACTGTGGGGT</b> GGAGGGGACAGAT |
|                            | <b>ATCGTTTTGGCC</b> .....-13..      |                |                                          |
| 4                          |                                     | <b>GA</b>      | ..-13..... <b>GGT</b> GGAGGGGACAGAT      |
|                            | <b>ATCGTTTTGGCCTCCCTAT</b> ....-6.. |                |                                          |
| 1,56,73                    |                                     |                | ..-13..... <b>GGT</b> GGAGGGGACAGAT      |
|                            | <b>ATCGTTTTGG</b> .....-15..        |                |                                          |
| 2                          |                                     | <b>A</b>       | ..-5.. <b>CACTGTGGGGT</b> GGAGGGGACAGAT  |
|                            | <b>AT</b> .....-24..                |                |                                          |
| 66                         |                                     |                | ..-24.....CAGAT                          |
|                            | <b>ATCGTTTTGGCCTCCCTAT</b> ....-6.. |                |                                          |
| 85                         |                                     |                | ..-7..... <b>CTGTGGGGT</b> GGAGGGGACAGAT |
|                            | <b>ATC</b> .....-23..               |                |                                          |
| 93                         |                                     |                | ..-15..... <b>TGGAGGGGACAGAT</b>         |
|                            | <b>ATCGTTTTGG</b> .....-15..        |                |                                          |
| 8                          |                                     |                | ..-7..... <b>CTGTGGGGT</b> GGAGGGGACAGAT |
|                            | <b>CA</b> .....-25..                |                |                                          |
| 29                         |                                     |                | ..-6.... <b>ACTGTGGGGT</b> GGAGGGGACAGAT |
|                            | .....-26..                          |                |                                          |
| 74                         |                                     |                | ..-35.....                               |
|                            | <b>ATCGTTTTGGCCTCCCTATCAGT</b> -2.. |                |                                          |
| 20                         |                                     |                | ..-22.....GACAGAT                        |
|                            | <b>ATCGTTTTGG</b> .....-15..        |                |                                          |
| 82                         |                                     | <b>AA</b>      | ..-37.....                               |
|                            | <b>ATCGTTTTGGCCTCCCTATCAG</b> .-3.. |                |                                          |
| 35                         |                                     |                | ..-31.....                               |
|                            | <b>ATCGTTTTGG</b> .....-15..        |                |                                          |
| 18                         |                                     |                | ..-24.....CAGAT                          |
|                            | <b>A</b> .....-28..                 |                |                                          |
| 59                         |                                     |                | ..-40.....                               |
|                            | <b>CA</b> .....-25..                |                |                                          |
| 16                         |                                     | <b>GTCAAGT</b> | ..-31.....                               |
|                            | .....-34..                          |                |                                          |
| 65                         |                                     |                | ..-24..... <u>CAGAT</u>                  |
|                            | .....-43..                          |                |                                          |
| 92                         |                                     | <b>GA</b>      | ..-47.....                               |
|                            | <b>ATCGTT</b> .....-20..            |                |                                          |
| 26                         |                                     |                | ..-10..... <b>TGGGGT</b> GGAGGGGACAGAT   |
|                            | <b>CA</b> .....-58..                |                |                                          |
| 30                         |                                     |                | ..-36.....                               |
|                            | <b>AGTA</b> .....-34..              |                |                                          |
| 23                         |                                     | <b>CTAGTAT</b> | ..-48.....                               |
|                            | <b>ATC</b> .....-24..               |                |                                          |
| 5                          |                                     |                | ..-66.....                               |
|                            | <b>ATCGTTTTGGCCTCCCT</b> .....-8..  |                |                                          |
| 55                         |                                     | <b>+10</b>     | ..-37.....                               |
|                            | .....-40..                          |                |                                          |
| 10bp:ACAAAACATT            |                                     |                |                                          |
| 70                         |                                     | <b>AC</b>      | ..-29.....                               |
|                            | .....-50..                          |                |                                          |
| 21                         |                                     |                | ..-41.....                               |
|                            | <b>CAG</b> .....-40..               |                |                                          |
| 52                         |                                     | <b>G</b>       | ..-373.....                              |
|                            | .....-29..                          |                |                                          |
| 85                         |                                     | <b>+23</b>     | ..-61.....                               |
|                            | .....-28..                          |                |                                          |
| 23bp:CATTAAGGATGGTGACAGAAA |                                     |                |                                          |
| 7                          |                                     |                | ..-49.....                               |
|                            | <b>AG</b> .....-40..                |                |                                          |
| 78                         |                                     |                | ..-45.....                               |
|                            | <b>C</b> .....-60..                 |                |                                          |
| 87                         |                                     |                |                                          |

```

.....-28..      GAGCTGT      ..-80.....
13
G.....-84..      ..-49.....
33
A.....-28..      ..-132.....
62
ATCGTTTTT.....-17..      ..-141.....
83
.....-169..      .TGGCCCCACTGTGGGGTGGAGGGGACAGAT
31
.....-175..      .-1GCCCCACTGTGGGGTGGAGGGGACAGAT
40
.....-183..      ..-5...CACTGTGGGGTGGAGGGGACAGAT
61
.....-151..      ..-38.....
84
GC.....-42..      ..-147.....
42
.....-31..      ..-173.....
19
GAG.....-107..      ..-111.....
44
.....-265..      ..-5...CACTGTGGGGTGGAGGGGACAGAT
54
.....-323..      ..-4...CCACTGTGGGGTGGAGGGGACAGAT
80
ATCGTTTTTGGC.....-14..      ..-323.....
50
CAG.....-40..      ..-47.....
6
CAA.....-27..      ..-406.....
34
ACATC.....-24..      ..-436.....
58
CAG.....-299..      ..-312.....
51
ATCGTTTTTGGCC.....-13..      +30      ..-50.....
30bp duplication from 215 bp upstream of DSB on chr22
ACTGCGCCAGCCACGTTTGGAGTTTTTGAACAGGGGAATACTCTTGCCATTGTTTCTTTTGAATCCAGGA
37
.....-44..      +52      ..-2CCCACTGTGGGGTGGAGGGGACAGAT
52 bp from chr7 Homo sapiens BAC clone RP11-310H4 from 7, complete sequence
TCCAGTGTCTTGTGGTTTGTGCTGAAACCTTTGGTCCCTCCAGGTCTCCCCA
24
ATCGTTTTT.....-17..      +46      ..-448.....
46bp inverted insertion from chr19, 333bp downstream of DSB
CTGGACAACCCAAAGTACCCCGTCTCCCTGGCTTTAGCCACCTCT

```



## Supplemental Experimental Procedures

### Nucleases

All nucleases target intronic sequences. ZFN<sup>EWS</sup>, ZFN<sup>FLI1</sup>, and ZFN<sup>P84</sup> have been described (Brunet et al., 2009; Piganeau et al., 2013). ZFN<sup>FLI-A</sup> and ZFN<sup>FLI-B</sup> were provided by Sangamo BioSciences, Inc. with an obligate heterodimer architecture through modification of the FokI nuclease domain (right ZFN FokI KK and left ZFN FokI EL) (Miller et al., 2007) and have the following recognition sites and helices. All ZFNs have FLAG epitope tags.

| ZFN Binding Sequence (underlined)                                                  | ZFN                | Finger 1            | Finger 2            | Finger 3            | Finger 4           | Finger 5           |
|------------------------------------------------------------------------------------|--------------------|---------------------|---------------------|---------------------|--------------------|--------------------|
| CCTAAGCCCTTTCTTCATTTGCCAGGAGTAGAGAGGACA<br>GGATTCGGGAAAGGAAGTAAACGGTCCATCTCTCTCTGT | FLI-A-R<br>FLI-A-L | DNPNLNR<br>RSDNLST  | RSDDLRSR<br>QSSDLRR | QRTHLTQ<br>RSDSLSV  | RSANLAR<br>QNQHRIN | RSDNLRE<br>QSGNLAR |
| GCCCCCTGGCCAGGTGTCCCCGATGAAAAGCAGGTTA<br>CGGGGACCGGTCCACAGGGGCTACTTTTCGTCCAAT      | FLI-B-R<br>FLI-B-L | HRSSLRR<br>RSDHLRSR | RSDNLSE<br>RSDHLTQ  | RNANRIT<br>ERGTLLAR | QSGNLAR<br>RSDHLTT | TSGNLTR<br>DQSTLRN |

TALEN assembly and TAL<sup>ALK</sup> and TAL<sup>NPM</sup> have been described (Piganeau et al., 2013). The sequences of TAL<sup>P84</sup> and TAL<sup>LAM</sup> are shown below with the TAL DNA binding domains underlined. TAL<sup>ALK</sup> and TAL<sup>P84</sup> have HA epitope tags; TAL<sup>LAM</sup>, and TAL<sup>NPM</sup> have FLAG epitope tags.

TAL<sup>P84</sup> subunits were assembled as described (Huang et al., 2011). For each TALEN subunit, the fragment containing the 16 RVD segment was obtained from single unit vectors: A (NI), T (NG), G (NN) and C (HD), kindly provided by the laboratory of Bo Zhang (Beijing) and subcloned in the pCS2 vector containing the wild-type FokI domain.

TAL<sup>P84</sup> recognition sequence (underlined):

TTTTCTGTACCAATCCTGTCCCTAGTGGCCCCACTGTGGGGTGGAGGGGA

TAL<sup>P84-L</sup>:

MAPKKRKYVPYDVPDYAGYPYDVPDYAGSYPYDVPDYAAHGTVDLRTLGYSSQQQOEKIKPKVR  
STVAQHHEALVGHGFTHAHIVALSQHPAALGTAVVKYQDMIAALPEATHEAIVGVGKQWSGARA  
LEALLTVAGELRGPPLQLDGTGQLLKIARGGVTAVEAVHAWRNALTGAPLNLTPEQVVAIASHD  
GGKQALETVQRLLPVLCQAHGLTPAQVVAIASHDGGKQALETVQRLLPVLCQAHGLTPAQVVAI  
ASHDGGKQALETVQRLLPVLCQAHGLTPAQVVAIASHDGGKQALETVQRLLPVLCQAHGLTPAQ  
VVAIASNNGGKQALETVQRLLPVLCQAHGLTPEQVVAIASHDGGKQALETVQRLLPVLCQAHGL  
TPAQVVAIASHDGGKQALETVQRLLPVLCQAHGLTPAQVVAIASNIGGKQALETVQRLLPVLCQ  
AHGLTPDQVVAIASHDGGKQALETVQRLLPVLCQAHGLTPAQVVAIASHDGGKQALETVQRLLP  
VLCQAHGLTPAQVVAIASHDGGKQALETVQRLLPVLCQAHGLTPAQVVAIASHDGGKQALETVQ  
RLLPVLCQAHGLTPAQVVAIASNIGGKQALETVQRLLPVLCQAHGLTPDQVVAIASHDGGKQAL  
ETVQRLLPVLCQAHGLTPAQVVAIASNIGGKQALETVQRLLPVLCQAHGLTPDQVVAIASNNGG  
KQALETVQRLLPVLCQAHGLTPEQVVAIASNNGGRPALESIVAQLSRPDPALAALTNHDLVALA  
CLGGRPALDAVKKGLPHAPALIKRTNRRIPERTSHRVA

TAL<sup>p84-R</sup>:

MAPKKRKYVPYDVPDYAGYPYDVPDYAGSYVPYDVPDYAAHGTVDLRTLGYSSQQQOEKIKPKVR  
STVAQHHEALVGHGFTHAHIVALSQHPAALGTVAVKYQDMIAALPEATHEAIVGVGKQWSGARA  
LEALLTVAGELRGPPPLQDGTGQLLKIARKGGVTAVEAVHAWRNALTGAPLNLTPEQVVAIASNG  
GGKQALETVQRLLPVLCQAHGLTPEQVVAIASNGGGKQALETVQRLLPVLCQAHGLTPEQVVAI  
ASNGGGKQALETVQRLLPVLCQAHGLTPEQVVAIASHDGGKQALETVQRLLPVLCQAHGLTPAQ  
VVAIASNGGGKQALETVQRLLPVLCQAHGLTPEQVVAIASNNGGKQALETVQRLLPVLCQAHGL  
TPEQVVAIASNGGGKQALETVQRLLPVLCQAHGLTPEQVVAIASHDGGKQALETVQRLLPVLCQ  
AHGLTPAQVVAIASNIGGKQALETVQRLLPVLCQAHGLTPDQVVAIASHDGGKQALETVQRLLP  
VLCQAHGLTPAQVVAIASHDGGKQALETVQRLLPVLCQAHGLTPAQVVAIASNIGGKQALETVQ  
RLLPVLCQAHGLTPDQVVAIASNIGGKQALETVQRLLPVLCQAHGLTPDQVVAIASNGGGKQAL  
ETVQRLLPVLCQAHGLTPEQVVAIASHDGGKQALETVQRLLPVLCQAHGLTPAQVVAIASHDGG  
KQALETVQRLLPVLCQAHGLTPAQVVAIASNGGGRPALESIVAQLSRPDPALAALTNDHLVALA  
CLGGRPALDAVKKGLPHAPALIKRTNRRIPERTSHRVA

TAL<sup>LAM</sup> cleaves the lamin locus on Chr1. Subunits were directly synthesized by Genent as described (Miller et al., 2011) using the RVD: A (NI), T (NG), G (NK) and C (HD) and subcloned in the pVax vector containing the wild-type FokI domain.

TAL<sup>LAM</sup> recognition sequence (underlined):

TTGCTCCCGTTCTCTCTTTTCTTCTTAAGCTCAGAGTAGCTA

TAL<sup>LAM-L</sup>:

MDYKDHDGDYKDHDIDYKDDDDKMAPKKRKYVGIHGVPMDLRTLGYSSQQQOEKIKPKVRSTVA  
QHHEALVGHGFTHAHIVALSQHPAALGTVAVKYQDMIAALPEATHEAIVGVGKQWSGARALEAL  
LTVAGELRGPPGTLDTGQLLKIARKGGVTAVEAVHAWRNALTGAPLNLTDPQVVAIASNGGGKQ  
ALETVQRLLPVLCQDHGLTPEQVVAIASNKGKQALETVQRLLPVLCQAHGLTPDQVVAIASHD  
GGKQALETVQRLLPVLCQAHGLTPAQVVAIASNGGGKQALETVQRLLPVLCQDHGLTPDQVVAI  
ASHDGGKQALETVQRLLPVLCQDHGLTPEQVVAIASHDGGKQALETVQRLLPVLCQAHGLTPAQ  
VVAIASHDGGKQALETVQRLLPVLCQDHGLTPDQVVAIASNKGKQALETVQRLLPVLCQDHGL  
TPEQVVAIASNGGGKQALETVQRLLPVLCQAHGLTPDQVVAIASNGGGKQALETVQRLLPVLCQ  
AHGLTPAQVVAIASHDGGKQALETVQRLLPVLCQDHGLTPDQVVAIASNGGGKQALETVQRLLP  
VLCQDHGLTPEQVVAIASHDGGKQALETVQRLLPVLCQDHGLTPEQVVAIASNGGGRPALESIV  
AQLSRPDPALAALTNDHLVALACLGGRPALDAVKKGLPHAPALIKRTNRRIPERTSHRVA

TAL<sup>LAM-R</sup>:

MDYKDHDGDYKDHDIDYKDDDDKMAPKKRKYVGIHGVPMDLRTLGYSSQQQOEKIKPKVRSTVA  
QHHEALVGHGFTHAHIVALSQHPAALGTVAVKYQDMIAALPEATHEAIVGVGKQWSGARALEAL  
LTVAGELRGPPGTLDTGQLLKIARKGGVTAVEAVHAWRNALTGAPLNLTDPQVVAIASNIGGKQ  
ALETVQRLLPVLCQDHGLTPEQVVAIASNKGKQALETVQRLLPVLCQAHGLTPDQVVAIASHD  
GGKQALETVQRLLPVLCQAHGLTPAQVVAIASNGGGKQALETVQRLLPVLCQDHGLTPDQVVAI  
ASNIGGKQALETVQRLLPVLCQDHGLTPEQVVAIASHDGGKQALETVQRLLPVLCQAHGLTPAQ  
VVAIASNGGGKQALETVQRLLPVLCQDHGLTPDQVVAIASHDGGKQALETVQRLLPVLCQDHGL  
TPEQVVAIASNGGGKQALETVQRLLPVLCQAHGLTPDQVVAIASNKGKQALETVQRLLPVLCQ  
AHGLTPAQVVAIASNIGGKQALETVQRLLPVLCQDHGLTPDQVVAIASNKGKQALETVQRLLP  
VLCQDHGLTPEQVVAIASHDGGKQALETVQRLLPVLCQDHGLTPEQVVAIASNGGGRPALESIV  
AQLSRPDPALAALTNDHLVALACLGGRPALDAVKKGLPHAPALIKRTNRRIPERTSHRVA

pCas9 GFP expressing wild-type Cas9 (Addgene plasmid 44719) and pCas9D10A GFP expressing nCas9 (Addgene plasmid 44720) allow simultaneous expression of GFP (Ding et al., 2013; Mali et al., 2013b). The gRNA expression vector was derived from Addgene plasmid 43860 MLM3636. Specific target sequences are underlined and PAM sequences are in bold:

NPM: **CCTCGAACTGCTACTGGGTTCACCTCAGCCTCTGGAATAGCTAGAACTACAGG**

gRNA(NPM1): 5'-GTGAACCCAGTAGCAGTTCG-3'

gRNA(NPM2): 5'-GCCTCTGGAATAGCTAGAACTAC-3'

ALK: **CCTCAGGTAACCCTAATCTGATCACGGTCCGTCATTGCATAGAGGAGG**

gRNA(ALK1): 5'-GATCAGATTAGGGTTACCTG-3'

gRNA(ALK2): 5'-GTCGGTCCATTGCATAGAGG-3'

### Cell lines

The human pre-B cell line NALM6 and its LIG4-defective derivative N114P2 (Grawunder et al., 1998) were maintained in RPMI 1640 medium supplemented with 10% heat inactivated fetal bovine serum (FBS). Human Dermal Fibroblasts, adult, HDFa (Life Technologies) and 411BR primary skin fibroblasts (O'Driscoll et al., 2001) were cultured in DMEM supplemented with 15% FBS and 1% pyruvate sulfate. The human wild-type HCT116 cell line and its derivatives generated by gene targeting were cultured in McCoy's 5A medium containing 10% FCS. LIG4 mutant (L4<sup>+/−</sup>, L4<sup>−/−</sup>) cells have been described (Oh et al., 2013). A manuscript detailing the derivation of XRCC4 mutant (X4<sup>+/−</sup>, X4<sup>−/−</sup>) cells is in preparation (B.R. and E.A.H.). X4<sup>−/−</sup> cells were propagated in media containing G418 (1 mg/ml).

HCT116 LIG3<sup>fllox/−</sup> cells containing a conditional LIG3 allele and a deletion allele (Oh et al., 2014), here termed L3<sup>+/−</sup>, were further engineered to express human LIG1 with a mitochondrial leader sequence (MtLIG1) as follows: a cDNA encoding the mitochondrial localization signal of human LIG3 (residues 1- 85) fused to human LIG1 (residues 233-918, which contains the catalytic core but not the nuclear localization signal) was constructed by ligating two PCR products. The resultant DNA fragment was linked with a cDNA encoding EYFP from Aequorea Victoria (Addgene plasmid 11180:pCAG-YFP), such that YFP was fused to the LIG1 C terminus, and then subcloned into the mammalian expression vector pCAGGS that confers resistance to neomycin (Addgene plasmid 31264:pGCGFP-G418). The final expression vector (pCAG-MLig1-YFP-neo) was confirmed by DNA sequencing and then transfected into L3<sup>+/−</sup> cells and YFP-positive cells were isolated by flow cytometry. To delete the remaining conditional LIG3 allele, cells were infected with an adenovirus type 5 (dE1/E3) virus encoding the Cre

recombinase, (Ad-CMV-Cre #1045, Vector Biolabs). After 24 h, cells were washed and then cultured in fresh medium containing 0.5 mg/ml G418. Single cells were isolated in 96-well plates using an SY3200 cell sorter. G418-resistant YFP-positive clones, i.e., expressing MtLIG1, that were also L3<sup>-/-</sup>, were identified by Western blotting using antibodies to human LIG1 (Peng et al., 2012), GFP (Santa Cruz #8334) and LIG3 (GeneTEX #103172). The L3<sup>-/-</sup> genotype was confirmed using primers Lig3 Exon 5 F1: 5'-AAA GCA ACC CTC CTG TCT TCT CCT GCA AGT-3' and Lig3 Exon 5 R1: 5'-TGG TAC CAG GGA TAG AGT CAC GGA CAA ACC AA-3'.

## Nucleofection

Cells were transfected by Amaxa technology (Lonza) using a cell line nucleofector. We used 10<sup>6</sup> HCT116 cells Kit V program D-032, 2 × 10<sup>6</sup> NALM6 and N114 cells Kit L program C-005, and 5 × 10<sup>5</sup> HDFa and 411BR cells Kit NHDF program P-022. For the Asel assay, HCT116 cells were nucleofected with 5 µg each ZFN<sup>EWS</sup> plasmid (i.e., ZFN<sup>EWS-R</sup> and ZFN<sup>EWS-L</sup>). For inducing the 3.2-kb deletion at FLII intron 4, we used 5 µg each ZFN<sup>FLI1-A</sup> and each ZFN<sup>FLI1-B</sup> plasmid.

To induce t(19;22), cells were nucleofected with 3 to 5 µg each ZFN<sup>EWS</sup> plasmid and 1 to 2.5 each µg ZFN<sup>p84</sup> plasmid, depending on the cell line. To induce t(1;19), cells were nucleofected with 3 µg each TAL<sup>LAM</sup> and 1 µg of TAL<sup>p84</sup> plasmid. To induce t(2;5), cells were nucleofected with 2.5 µg each TAL<sup>NPM</sup> and 1 µg each TAL<sup>ALK</sup>, 3.5 µg pCas9 GFP mixed with 3.5 µg each gRNA plasmid (ALK1+NPM1), or 3.5 µg pCas9D10A GFP mixed with 3.5 µg each gRNA plasmid (ALK1+ALK2+NPM1+NPM2).

## Immunoblotting and knockdowns

Whole-cell extracts were prepared with protein lysis buffer (50 mM Tris-HCl at pH 7.4, 1% Triton X-100, 0.1% SDS, 150 mM NaCl, 1 mM EDTA, and 1 mM DTT prepared from a 1 M DTT stock), with addition of cocktail protease inhibitor tablets (Complete, Roche). Typically 30 µg of protein extract from cells were electrophoresed on an 8% (w/v) Tris-HCl SDS PAGE gel, blotted, and then probed with antibody: anti-human LIG4 rabbit monoclonal antibody (Gene Tex), XRCC4 goat antibody clone C-20 (Santa Cruz Biotechnology), CtIP mouse monoclonal antibody 14-1 (Yu and Baer, 2000), ALK (31F12) mouse antibody (Cell Signal); anti-human LIG3 mouse monoclonal antibody (Becton Dickinson), FLAG mouse antibody (Sigma-Aldrich), HA rat antibody (Covance), alpha-tubulin (Sigma-Aldrich), and beta-actin (Sigma-Aldrich).

For CtIP knockdown experiments, cells were plated at a density of 2 × 10<sup>5</sup> cells per well in 6-well plates one day prior the transfection, and transfected using Lipofectamine<sup>TM</sup> RNAiMax (Invitrogen) with 40 nmol siRNA: siControl 5'-UGUGACUUAUCGGUGUGAC-3' or siCtIP 5'-

GCUAAAACAGGAACGAAUC-3', following the manufacturer's protocol. Cells were incubated with the siRNA for 24 h, and media was removed prior to ZFN nucleofection (t0), as described above. The level of knock down was evaluated using Western blotting. Translocation frequency was determined at 48 h (t2).

### **Repair assays**

T7 endonuclease I assays, based on the Surveyor assay (Guschin et al., 2010), have been described (Piganeau et al., 2013). Genomic DNA was isolated 48 h after transfection. Quantifications were made with Image J software. For the p84/AAVS1 locus, the uncut band is 353 bp; T7 cleavage gives ~233 bp and ~120 bp cut bands; for the ALK locus, the uncut band is 401 bp; T7 cleavage gives ~231 bp and ~170 bp cut bands. For intrachromosomal repair involving a single DSB (AseI assay), genomic DNA was isolated from cells 48 h after ZFN<sup>EWS</sup> nucleofection. A ~724 bp PCR amplicon including the ZFN<sup>EWS</sup> target site was generated using primers surrounding the EWS site, and then digested in vitro with AseI (New England BioLabs). AseI-resistant PCR products were gel purified with a gel purification kit (Cycle Pure Kit, EZNA) and reamplified. Products were cloned with a TOPO TA cloning kit (Invitrogen) and sequenced (GATC Biotech).

For intrachromosomal distal repair involving two DSBs, genomic DNA was isolated from cells 48 h after ZFN<sup>FLI-A</sup> and ZFN<sup>FLI-B</sup> transfection. A fragment corresponding to the 3.2-kb deletion was PCR amplified using primers flanking the two DSBs, and products were cloned and sequenced. Serial dilutions were performed with the same primer set.

Translocation frequency was calculated from a 96-well screen using small pools of cells and nested PCR to amplify translocation junctions 48 h after transfection, as described (Brunet et al., 2009; Piganeau et al., 2013). Frequencies were normalized to the number of viable cells 24 h after transfection. Cells were also counted 48 h after transfection; overall, mutant cells were reduced in number ~15%. Primers are listed below. Statistical analyses used a t test for frequency comparisons and Mann-Whitney for deletion and microhomology distributions.

## Primers

| <b>Intrachromosomal Assays</b> |                                                              |                                                                 |
|--------------------------------|--------------------------------------------------------------|-----------------------------------------------------------------|
| gene                           |                                                              |                                                                 |
| <i>EWS</i>                     | AseI-F- GCCACGTTTGGAGTTTTTGA                                 | AseI-R- GGGCTGAGCTCCATAAATCA                                    |
| <i>FLI1</i>                    | FL1-NF- TCCACCCAGTTTTCCAGAGC                                 | FL1-NR- TTTATTGAGGGCATTTTTGC                                    |
| <b>T7 Cleavage</b>             |                                                              |                                                                 |
| <i>p84</i>                     | p84-F-GTGTGTCACCAGATAAGGAATC                                 | P84-R-TCTAGTCTGTGCTAGCTCTTCC                                    |
| <i>ALK</i>                     | ALK-F-AGATGGGCAGAGGCTTGAAAAG                                 | ALK-R-TGAGGATGTTCTGGAAGGCAAA                                    |
| <b>Translocations</b>          |                                                              |                                                                 |
|                                | <b>PCR(1)</b>                                                | <b>Nested-PCR(2)</b>                                            |
| <b>t(1;19)</b><br>Der1         | DER1-F-CACCACGTGAGTGGTAGCC<br>DER1-R-GGGTTCCTTTTCCTTCTCC     | DER1-NF- GCCTGGCCTTTCTTCTCTCT<br>DER1-NR- CCTGTGCCATCTCTCGTTTC  |
| <b>t(19;22)</b><br>Der19       | DER19-F-CCTAGGACGCACCATTCTCA<br>DER19-R-GGGGCTGAGCTCCATAAATC | DER19-NF-CAAAGGGAGTTTTCCACACG<br>DER19-NR-GAAATCCCCGTGGATAGAATG |
| Der22                          | DER22-F-GCCTCCCGAGTAGCTGAGAT<br>DER22-R-GGGTTCCTTTTCCTTCTCC  | DER22-NF-TGCCACTATGCCAGCTATT<br>DER22-NR-CCTGTGCCATCTCTCGTTTC   |
| <b>t(2;5)</b><br>Der5          | DER5-F-CAGTTGCTTGGTTCCAGTT<br>DER5-R-AGGAATTGGCCTGCCTTAGT    | DER5-NF-GGGGAGAGGAAATCTTGCTG<br>DER5-NR-GCAGCTTCAGTGCAATCACA    |

## Supplemental References

- Ding, Q., Lee, Y.K., Schaefer, E.A., Peters, D.T., Veres, A., Kim, K., Kuperwasser, N., Motola, D.L., Meissner, T.B., Hendriks, W.T., *et al.* (2013). A TALEN genome-editing system for generating human stem cell-based disease models. *Cell Stem Cell* 12, 238-251.
- Guschin, D.Y., Waite, A.J., Katibah, G.E., Miller, J.C., Holmes, M.C., and Rebar, E.J. (2010). A rapid and general assay for monitoring endogenous gene modification. *Methods Mol Biol* 649, 247-256.
- Huang, P., Xiao, A., Zhou, M., Zhu, Z., Lin, S., and Zhang, B. (2011). Heritable gene targeting in zebrafish using customized TALENs. *Nat Biotechnol* 29, 699-700.
- Miller, J.C., Holmes, M.C., Wang, J., Guschin, D.Y., Lee, Y.L., Rupniewski, I., Beausejour, C.M., Waite, A.J., Wang, N.S., Kim, K.A., *et al.* (2007). An improved zinc-finger nuclease architecture for highly specific genome editing. *Nat Biotechnol* 25, 778-785.
- Miller, J.C., Tan, S., Qiao, G., Barlow, K.A., Wang, J., Xia, D.F., Meng, X., Paschon, D.E., Leung, E., Hinkley, S.J., *et al.* (2011). A TALE nuclease architecture for efficient genome editing. *Nat Biotechnol* 29, 143-148.
- Peng, Z., Liao, Z., Dziegielewska, B., Matsumoto, Y., Thomas, S., Wan, Y., Yang, A., and Tomkinson, A.E. (2012). Phosphorylation of serine 51 regulates the interaction of human DNA ligase I with replication factor C and its participation in DNA replication and repair. *J Biol Chem* 287, 36711-36719.
- Simsek, D., Furda, A., Gao, Y., Artus, J., Brunet, E., Hadjantonakis, A.K., Van Houten, B., Shuman, S., McKinnon, P.J., and Jasin, M. (2011a). Crucial role for DNA ligase III in mitochondria but not in Xrcc1-dependent repair. *Nature* 471, 245-248.
- Yu, X., and Baer, R. (2000). Nuclear localization and cell cycle-specific expression of CtIP, a protein that associates with the BRCA1 tumor suppressor. *J Biol Chem* 275, 18541-18549.
